# Supplementary material for: Cross-disorder comparative analysis of comorbid conditions reveals novel autism candidate genes
Source: PubMed Central journal article supplement (PMC5399393; doi:10.1186/s12864-017-3667-9), 2017-04-20

GSE18123gpl570 PBC p-values Histogram

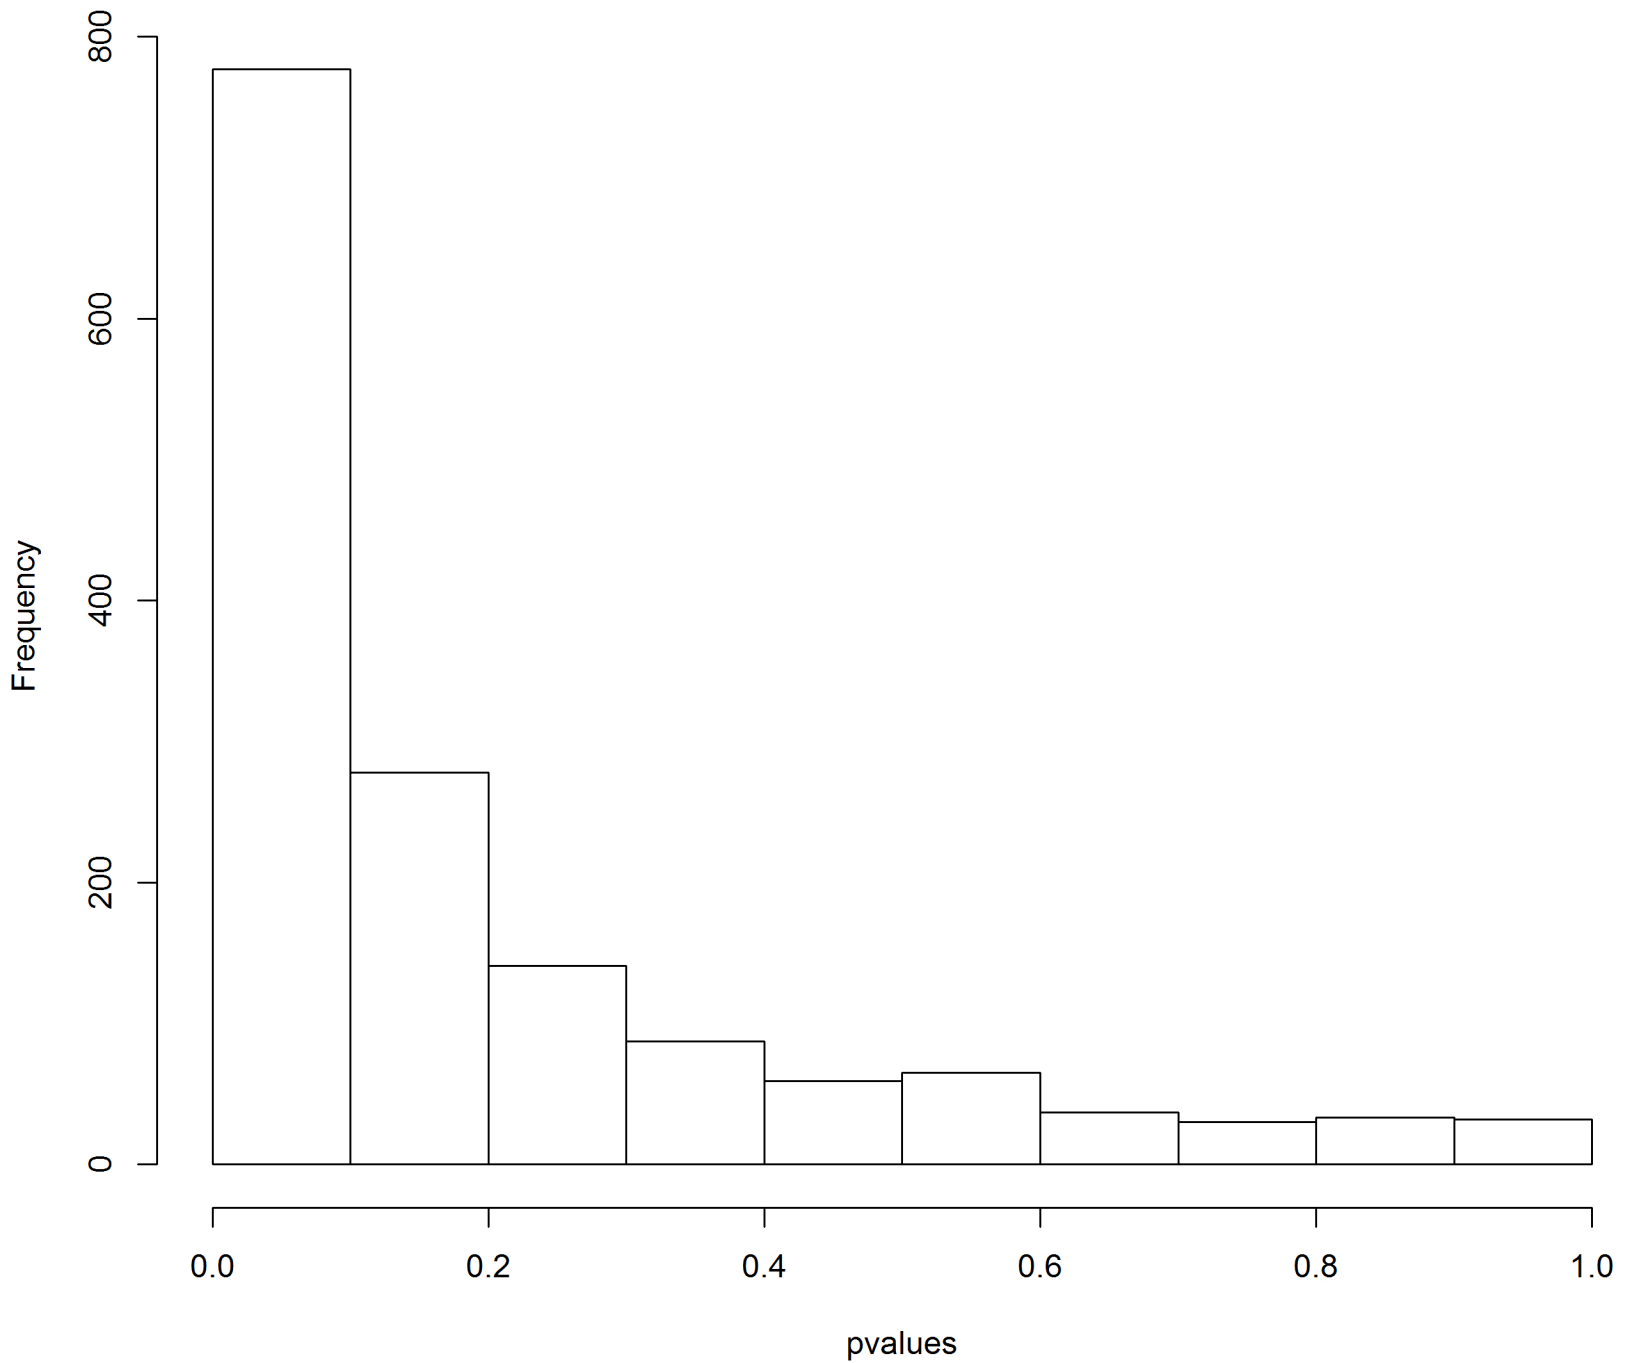

GSE18123gpl570 PBC q-values Histogram

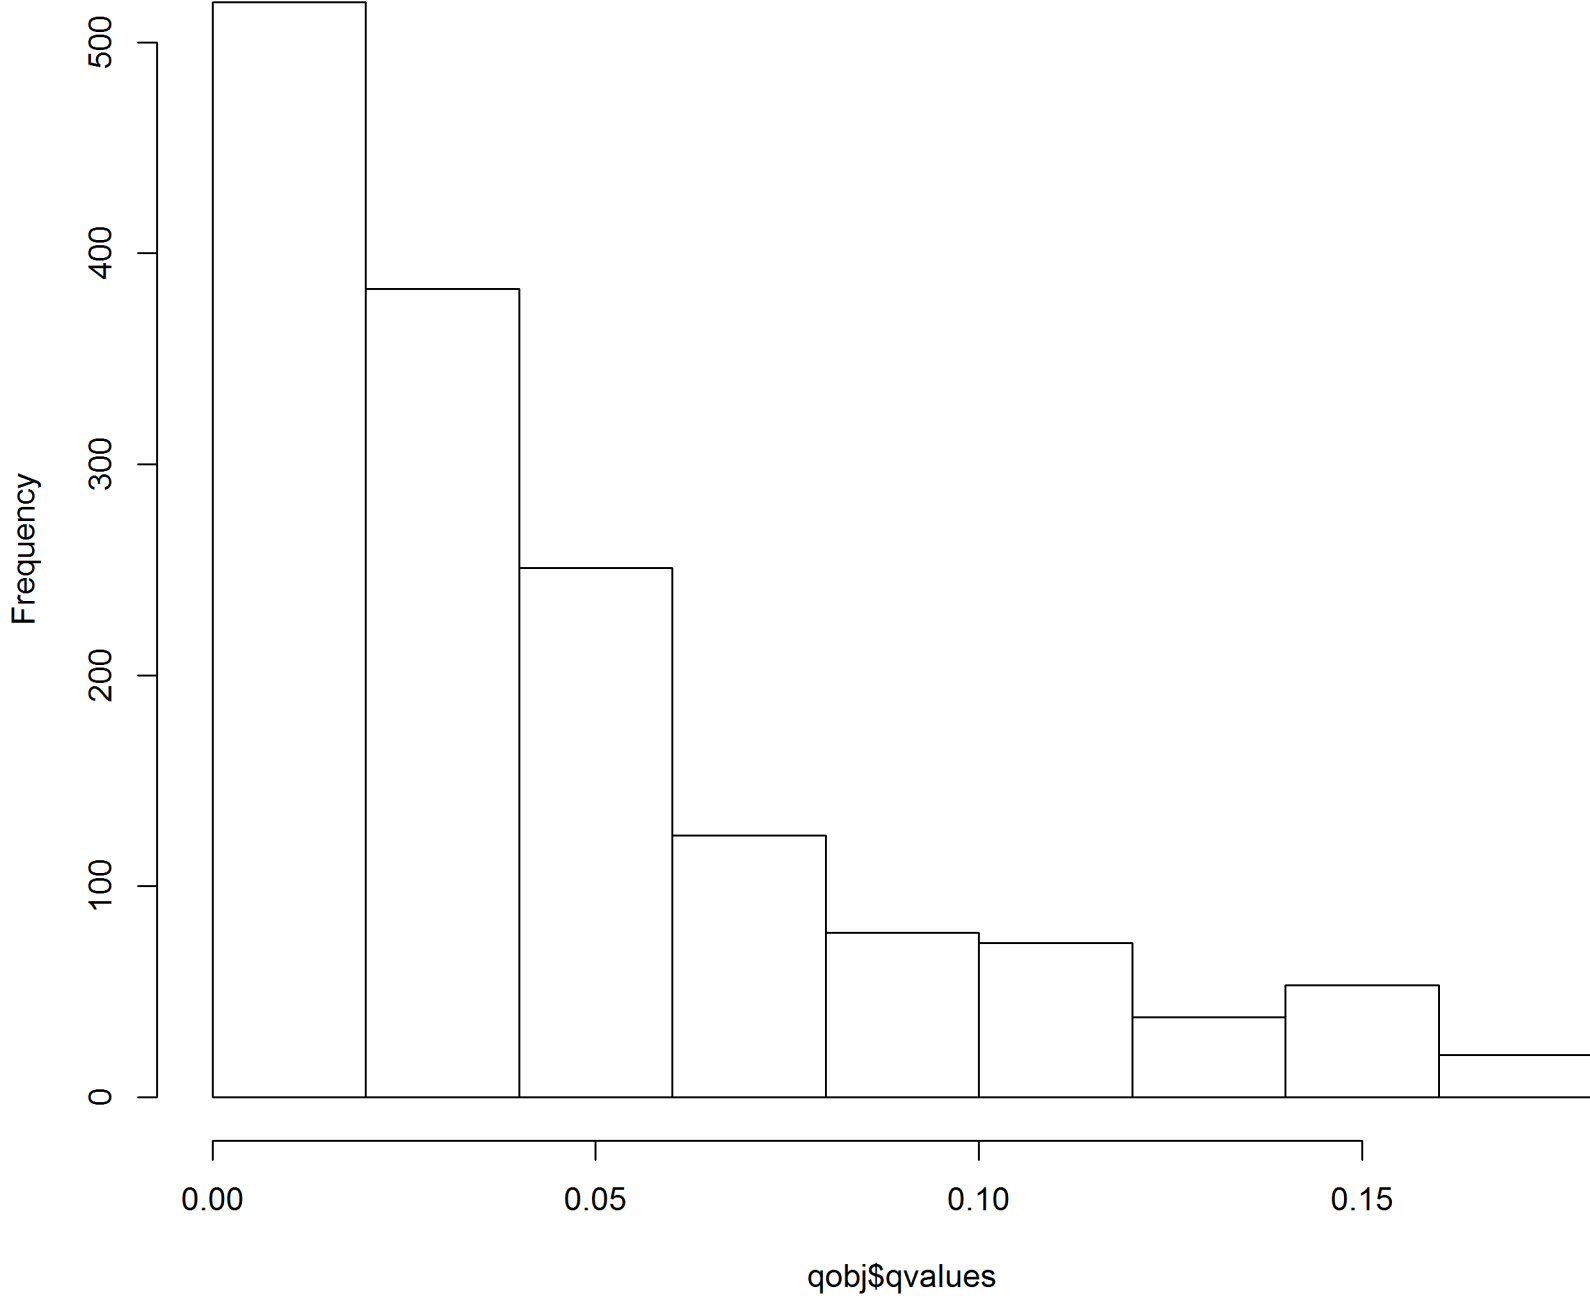

# GSE18123gpl570 PBC q-plots

$\hat{\pi}_0 = 0.171$

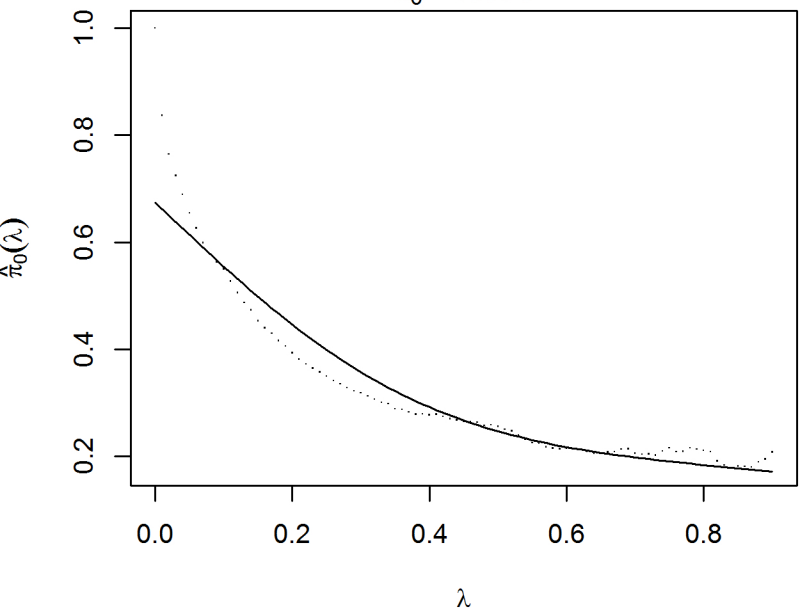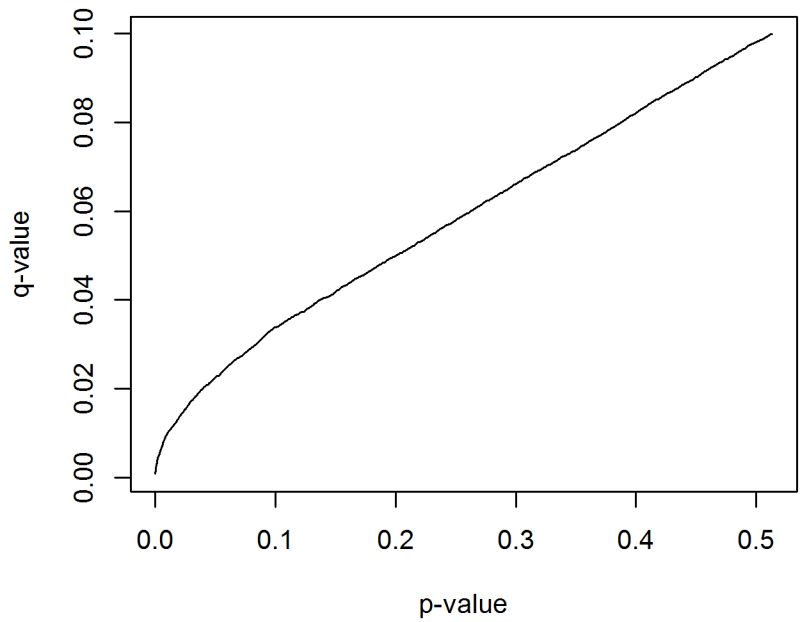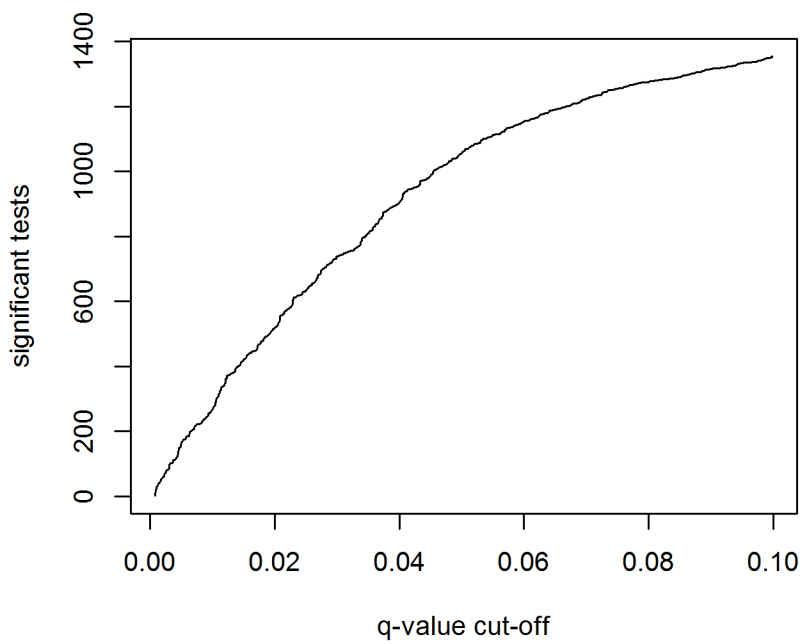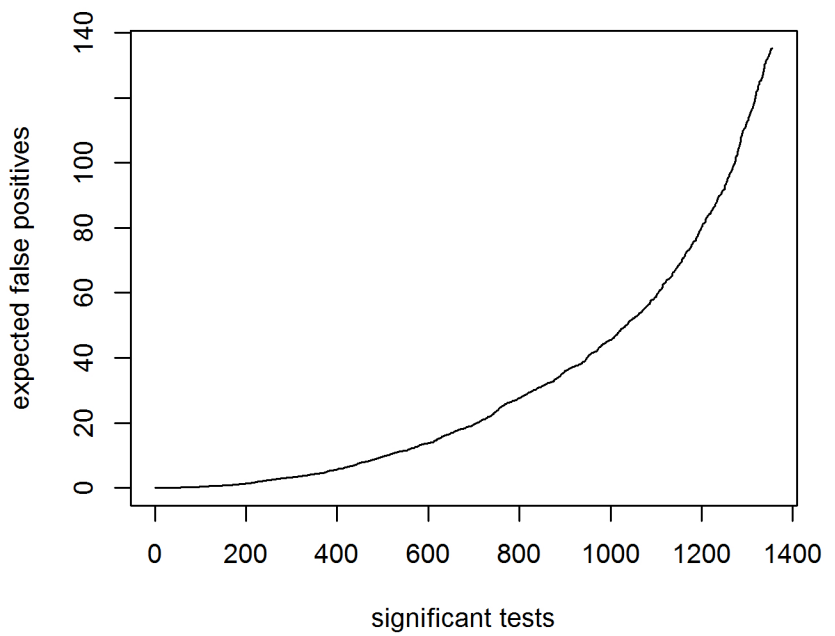

GSE18123gpl570 NBC p-values Histogram

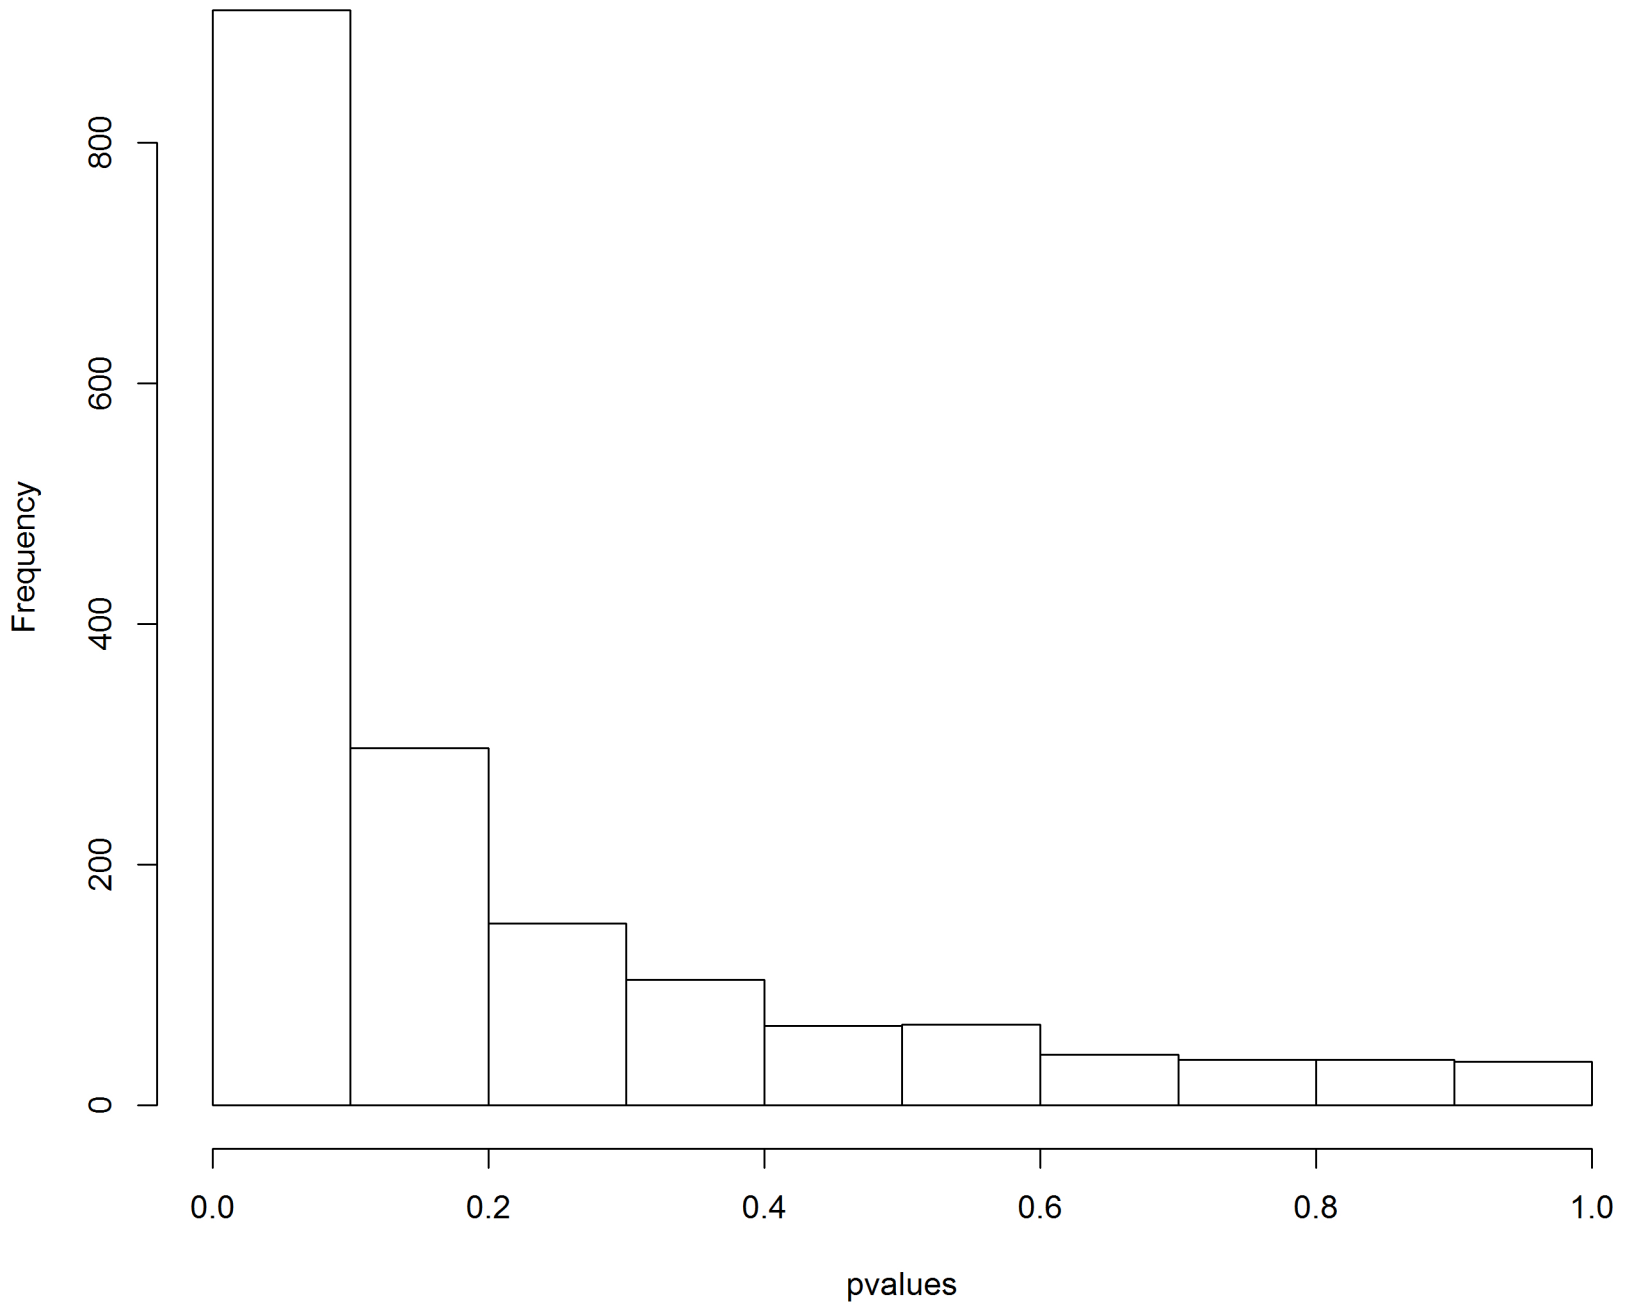

GSE18123gpl570 NBC q-values Histogram

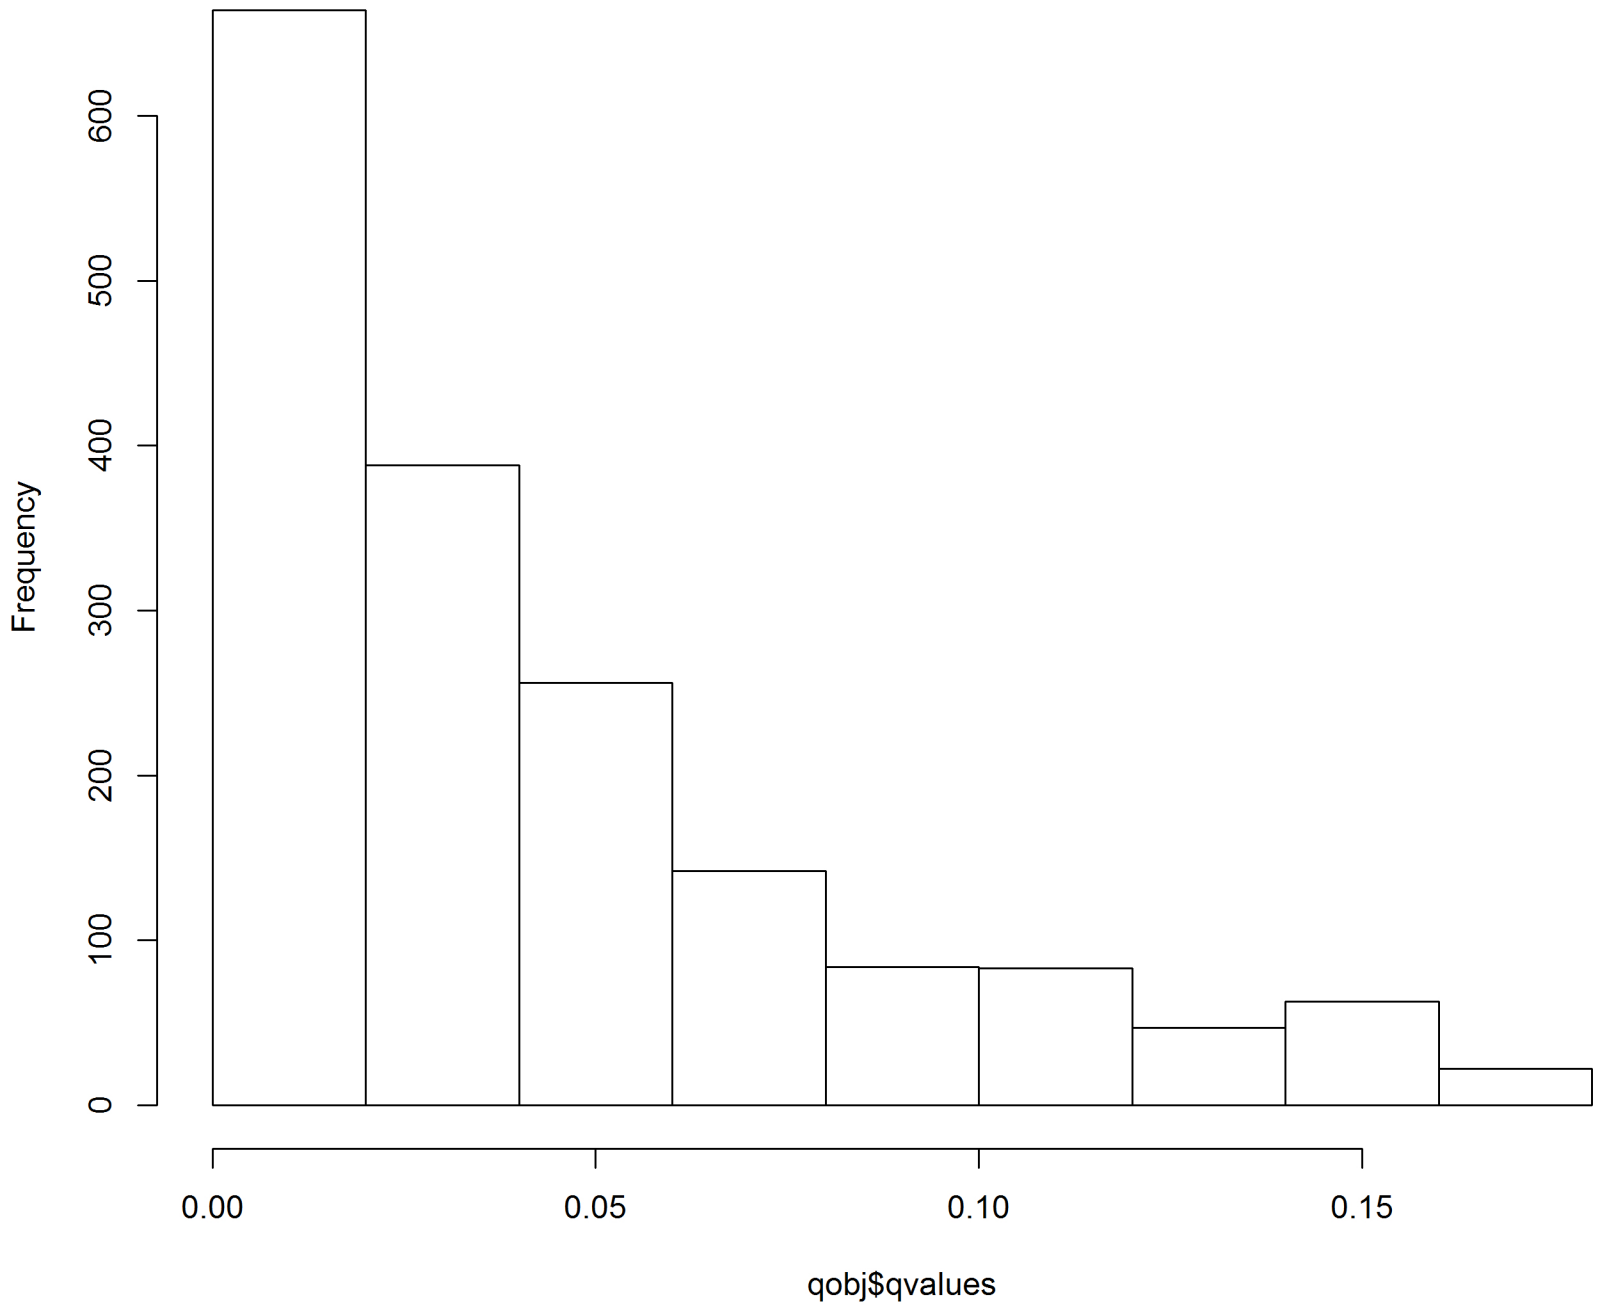

# GSE18123gpl570 NBC q-plots

$\hat{\pi}_0 = 0.172$

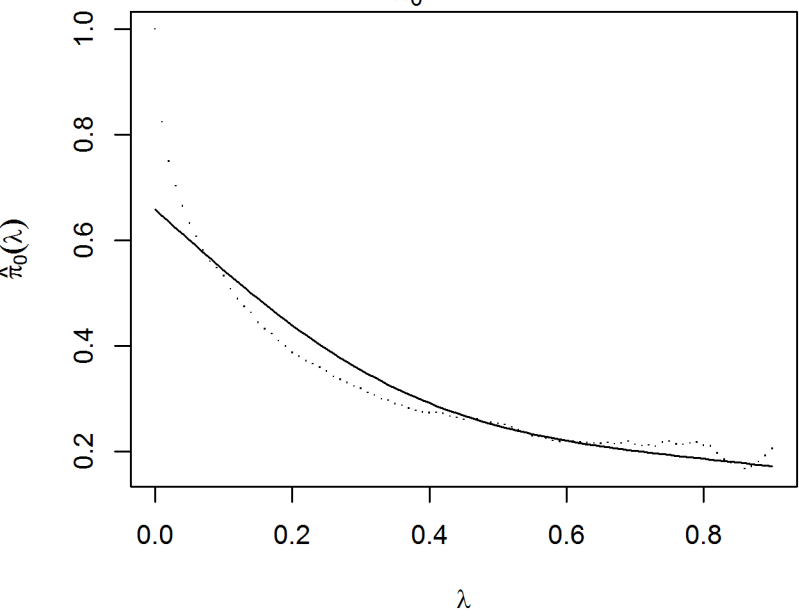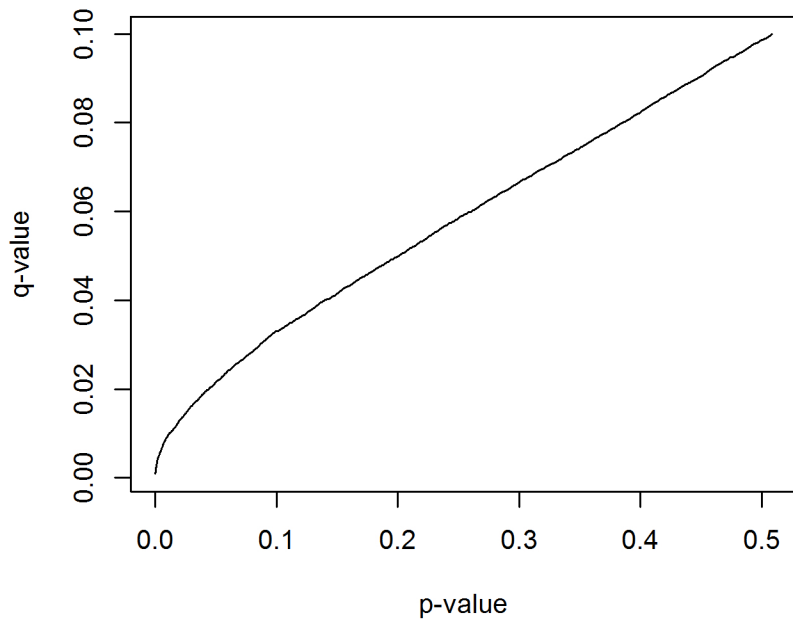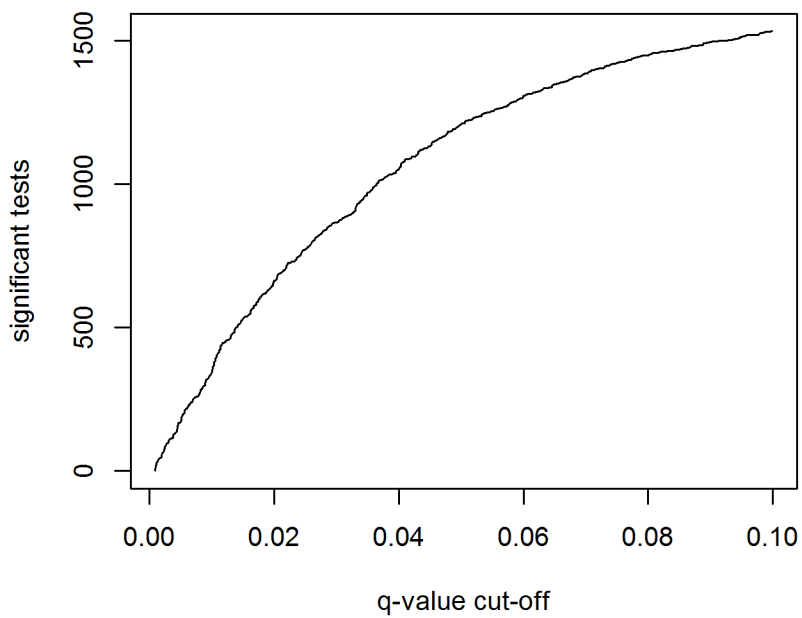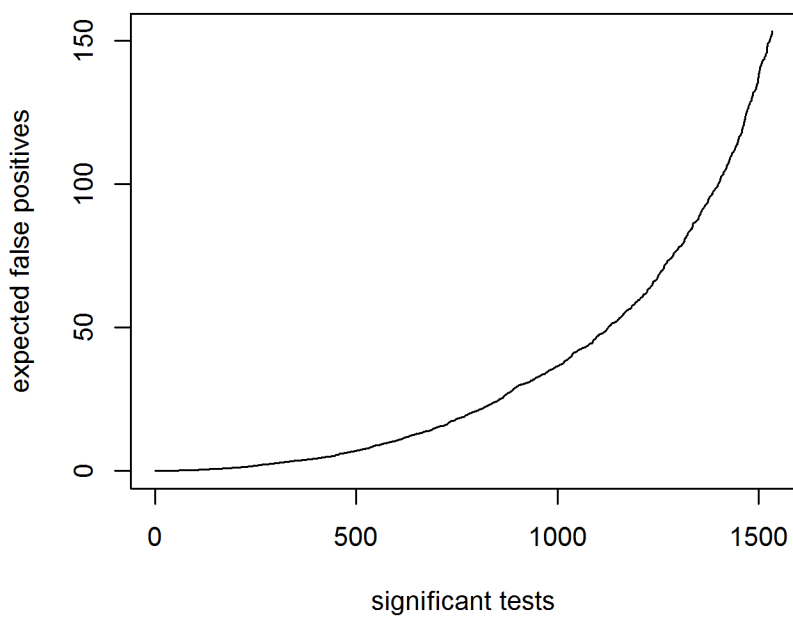

GSE25507 PBC p-values Histogram

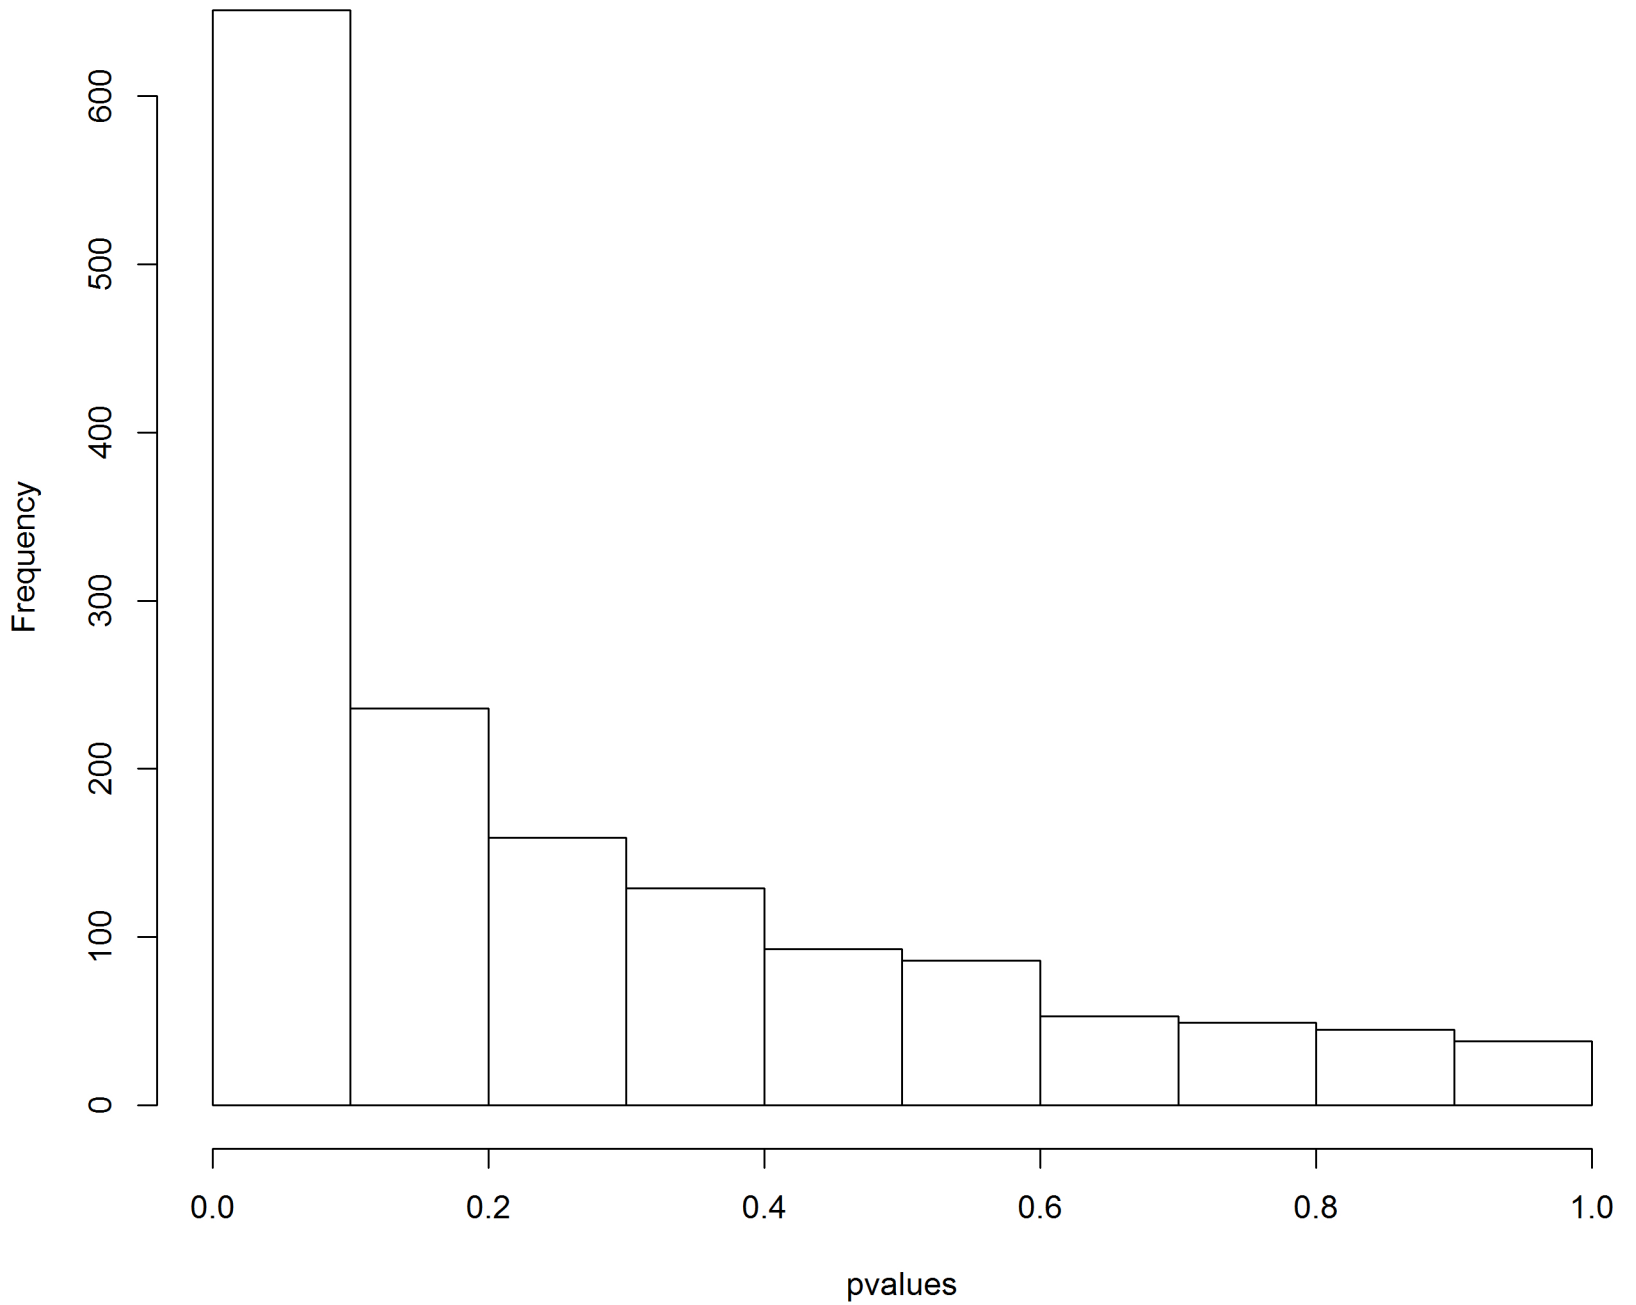

GSE25507 PBC q-values Histogram

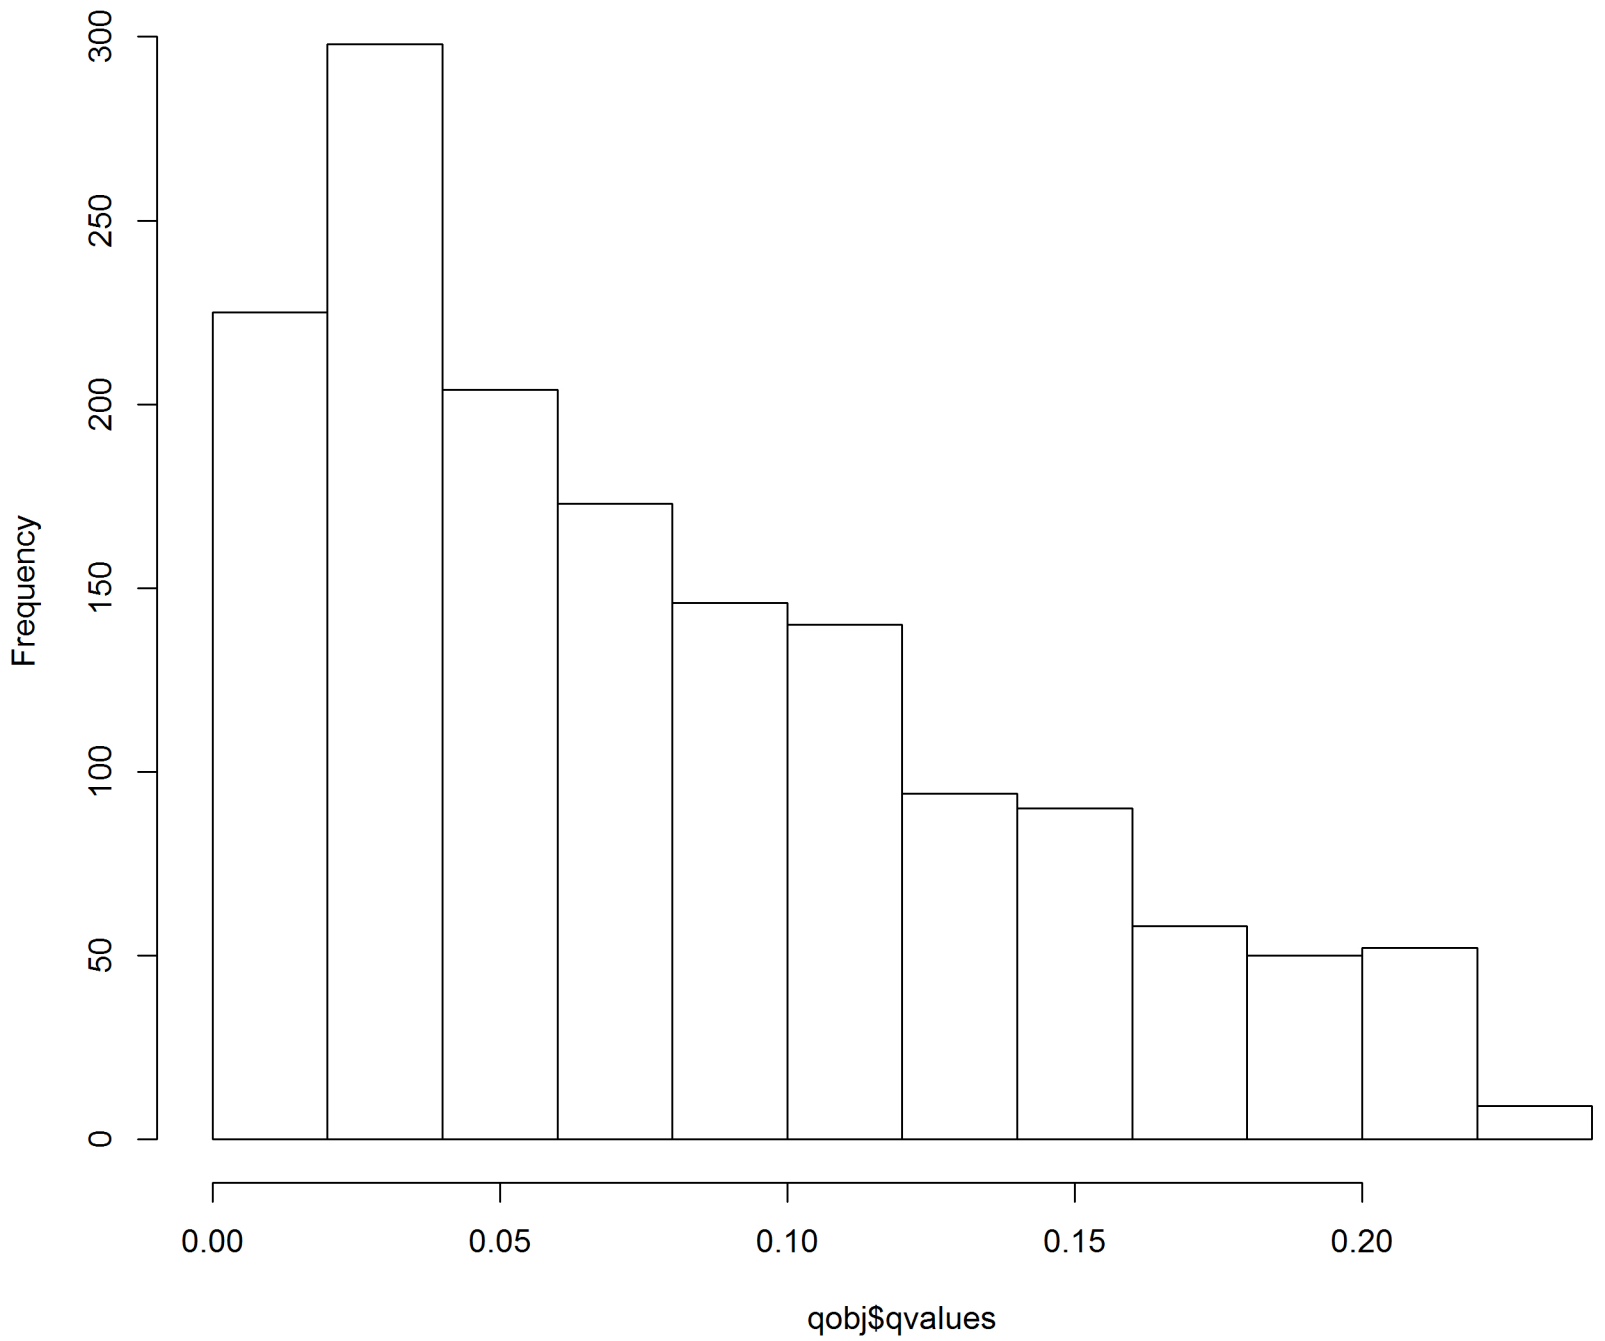



# GSE25507 PBC q-plots

$\hat{\pi}_0 = 0.227$

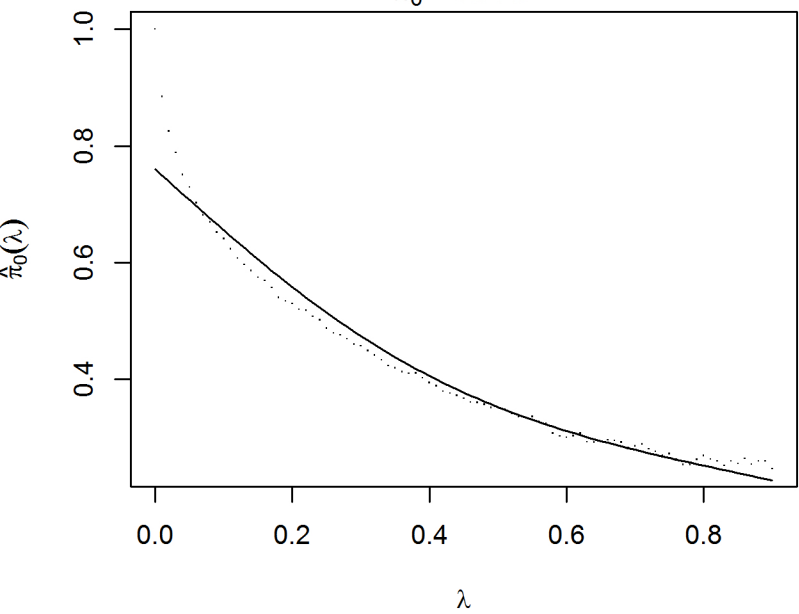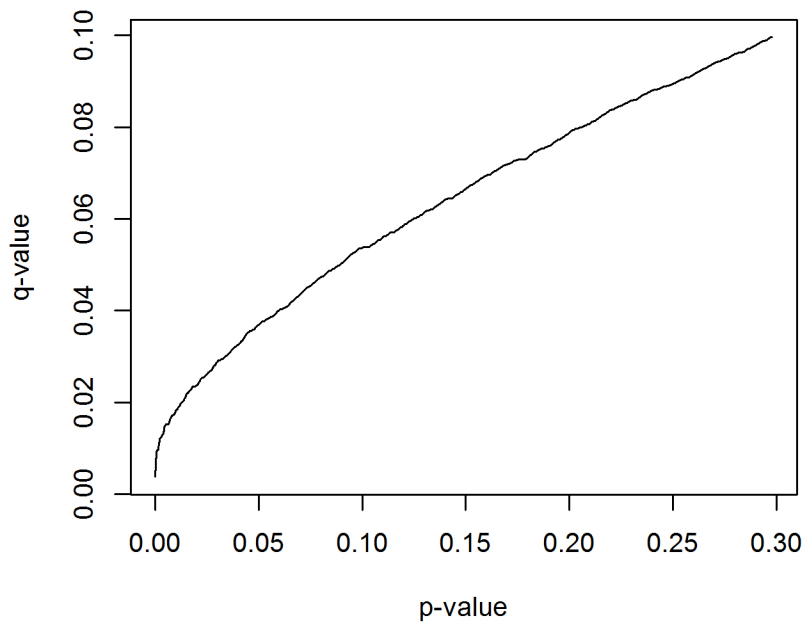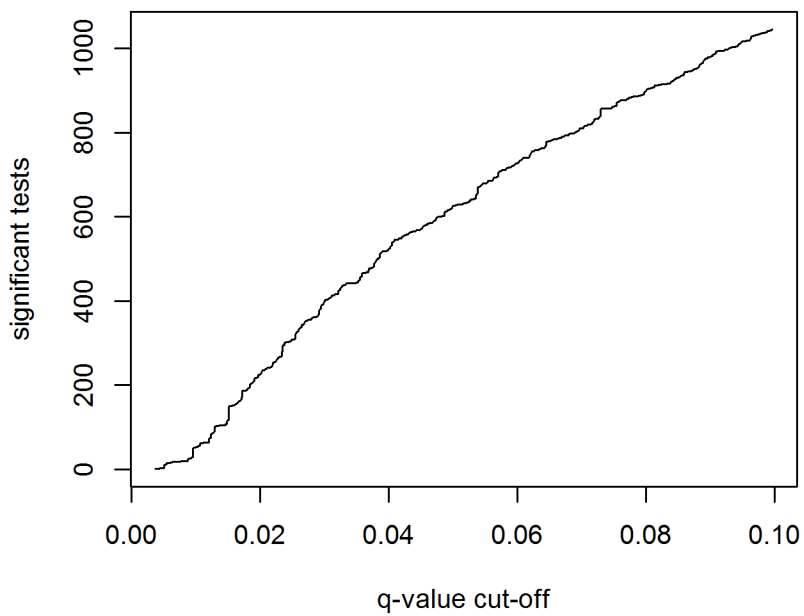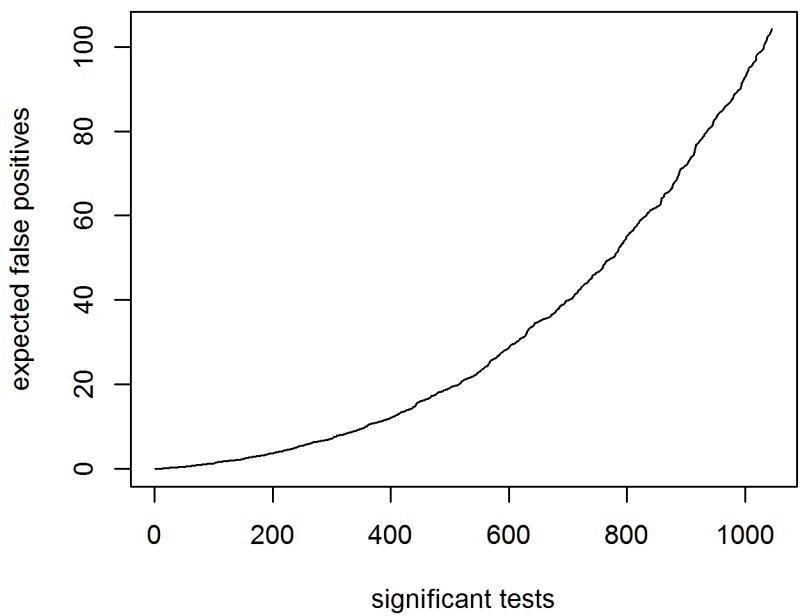

GSE25507 NBC p-values Histogram

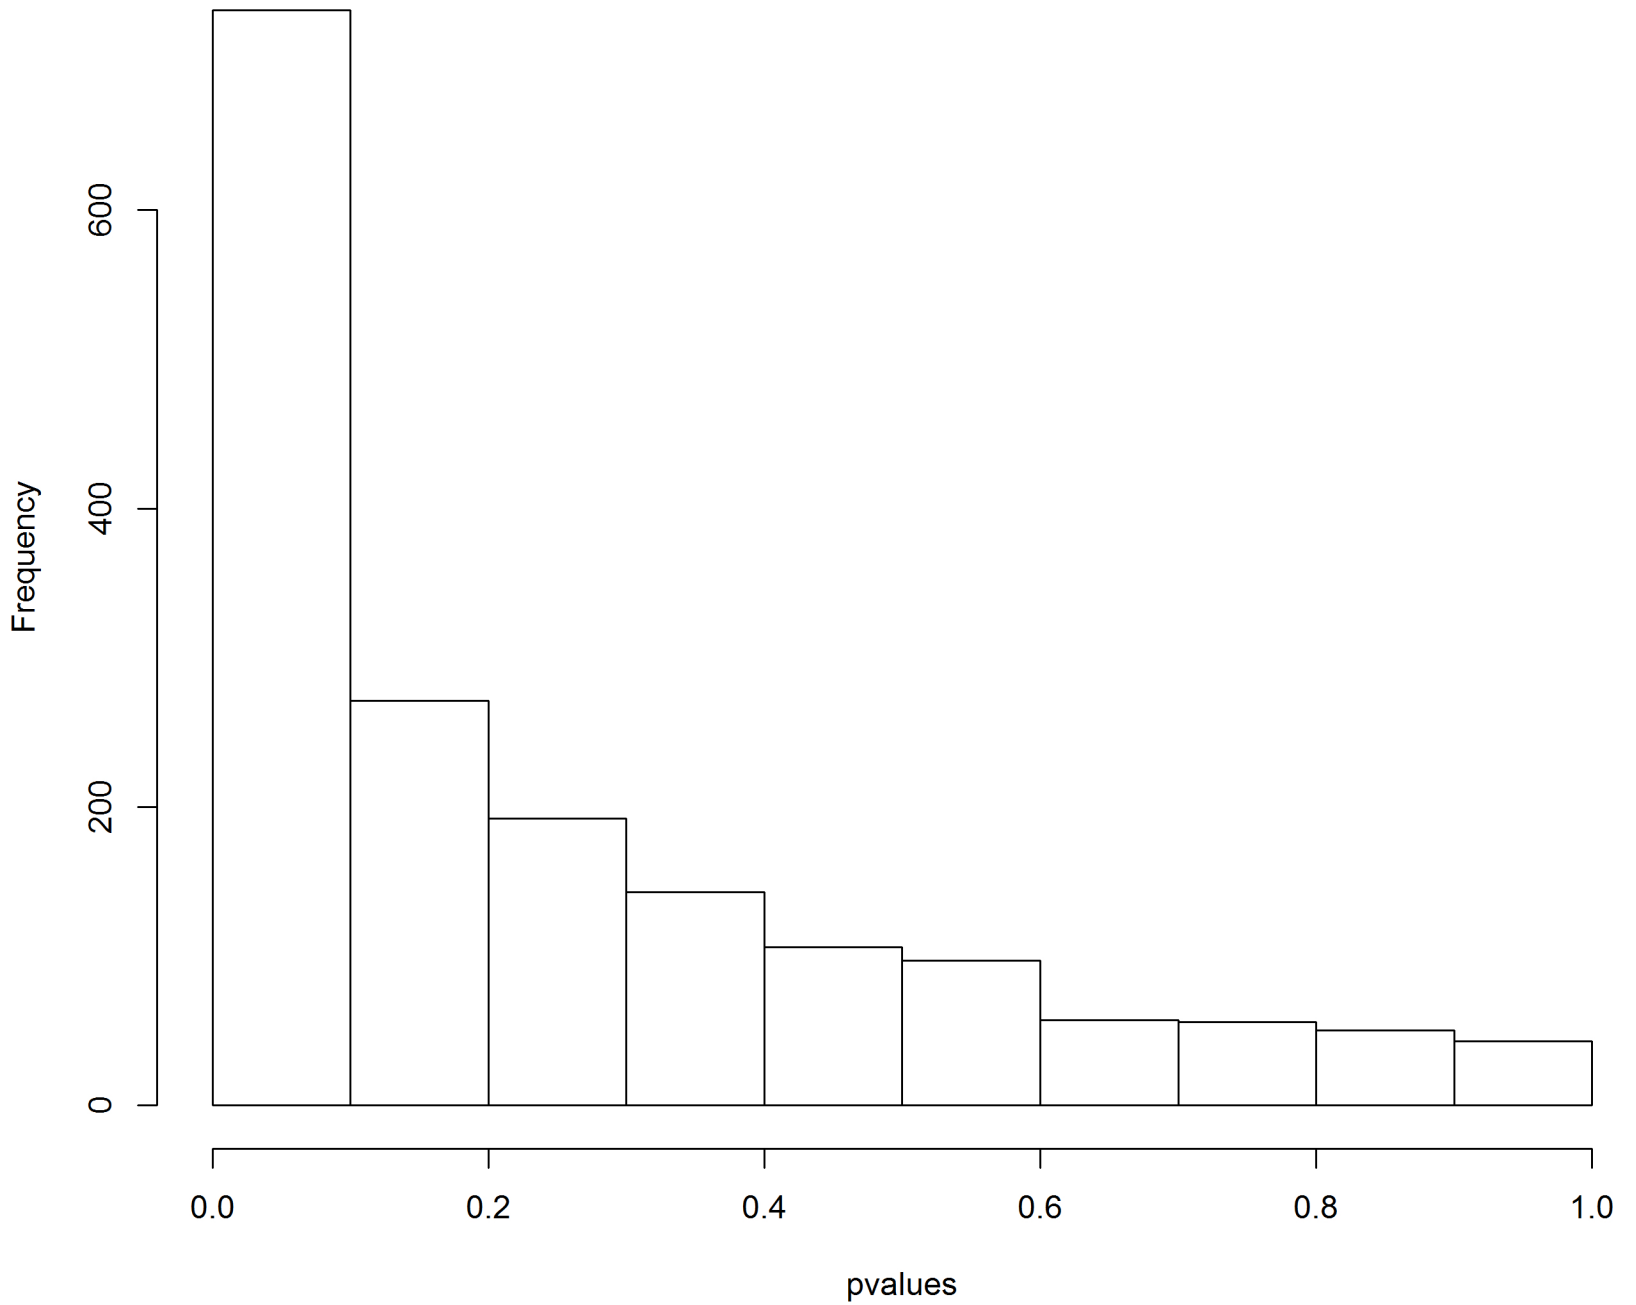

GSE25507 NBC q-values Histogram

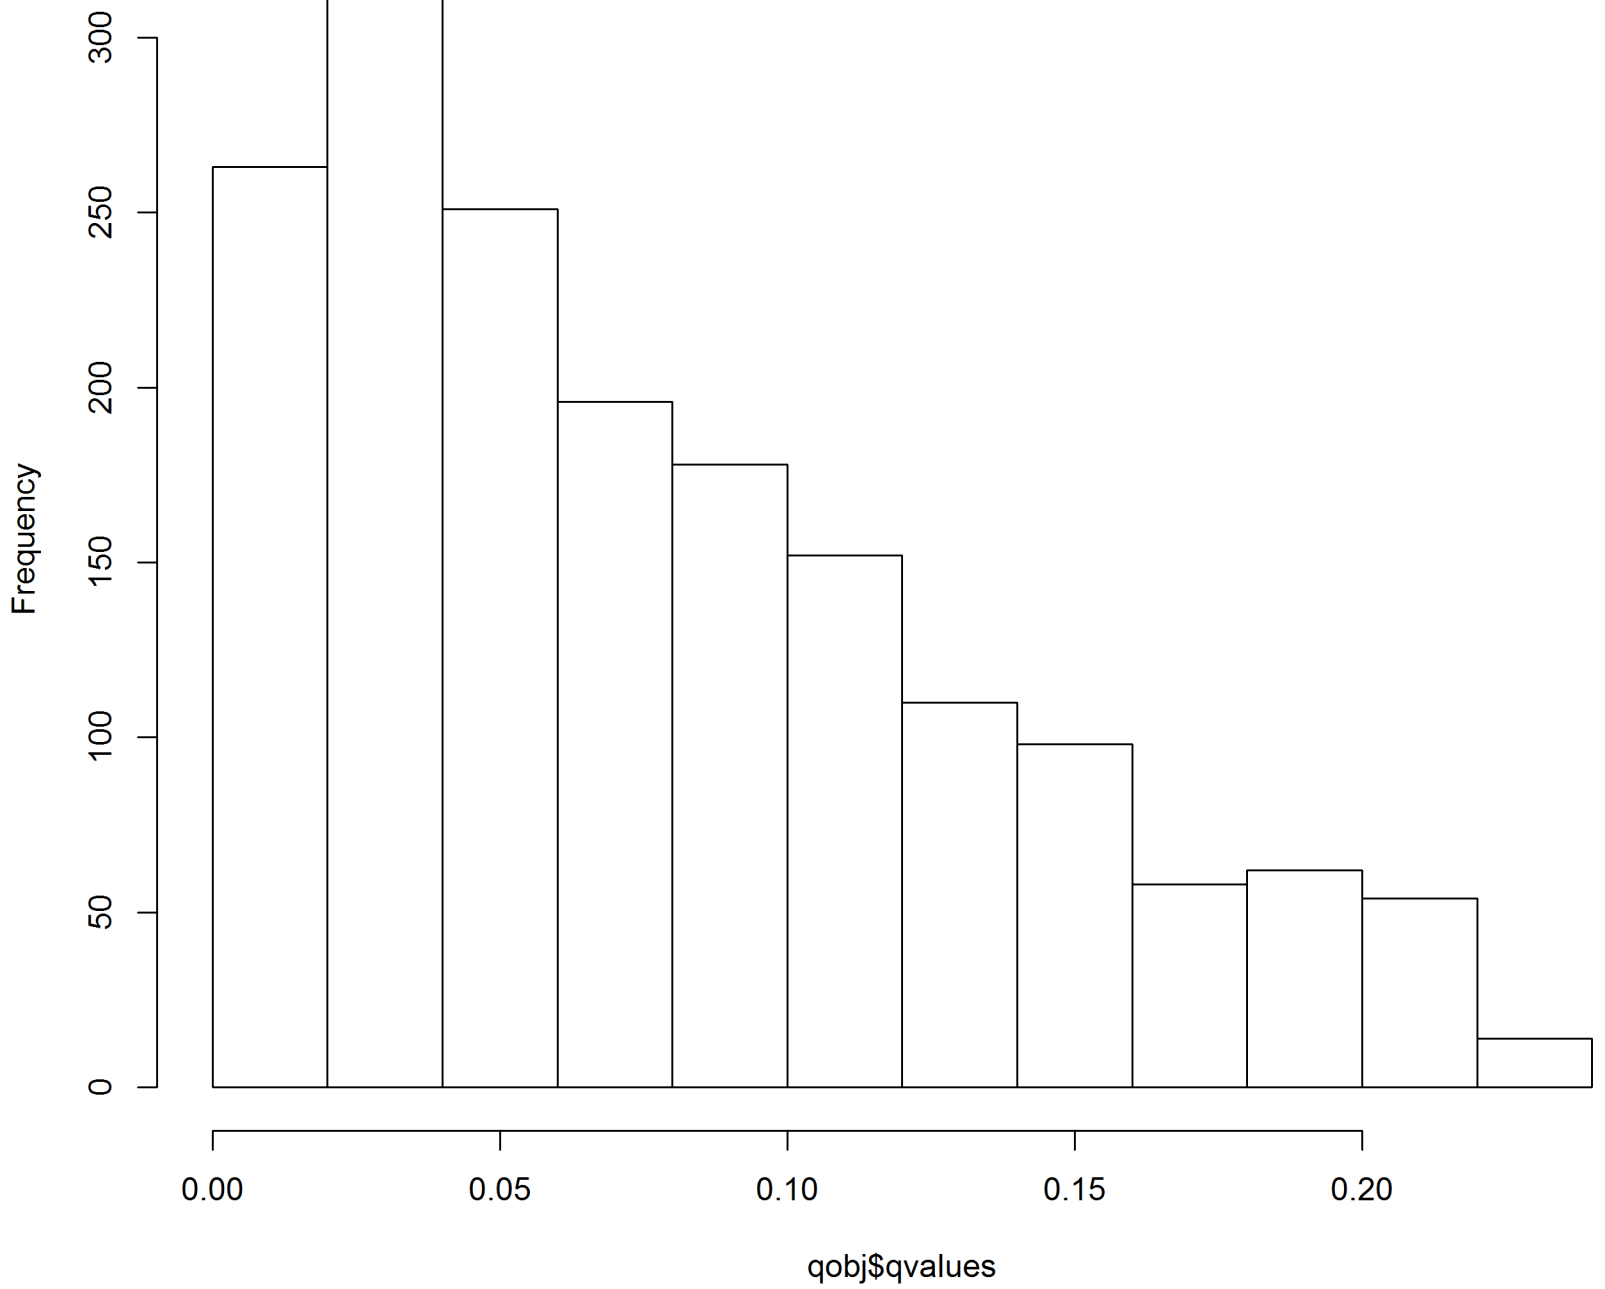

# GSE25507 NBC q-plots

$\hat{\pi}_0 = 0.227$

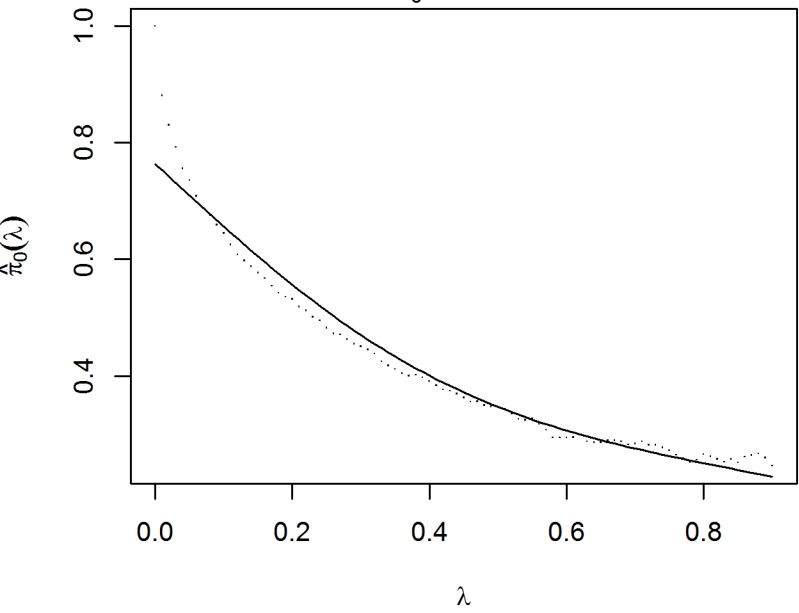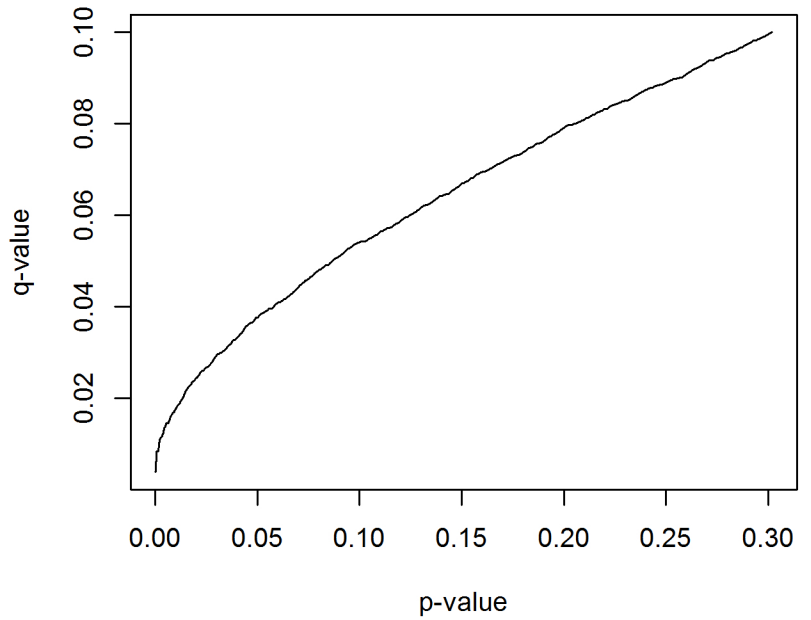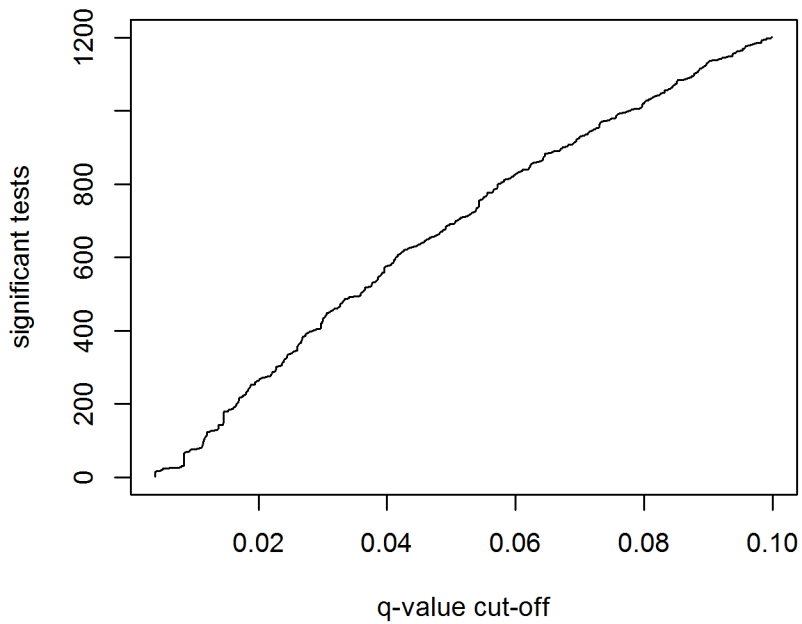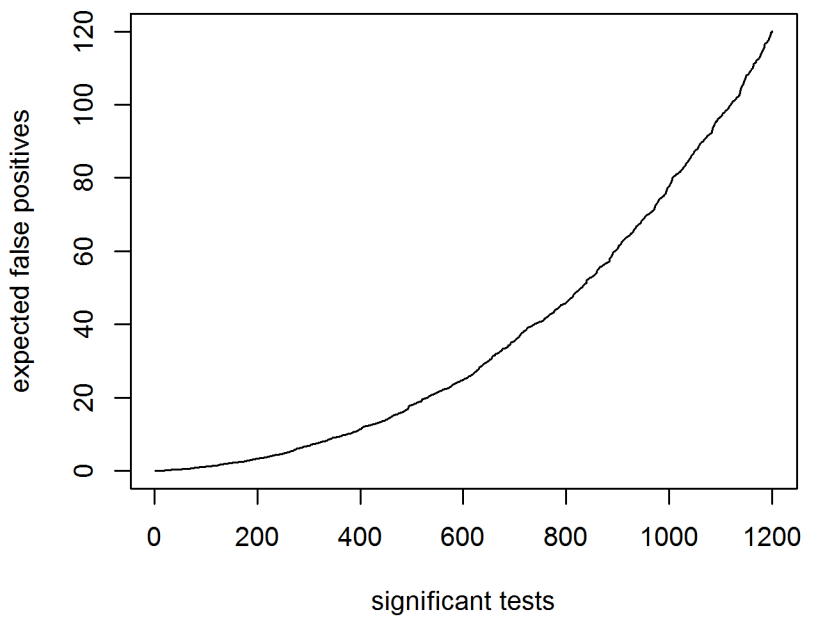

GSE42133 PBC p-values Histogram

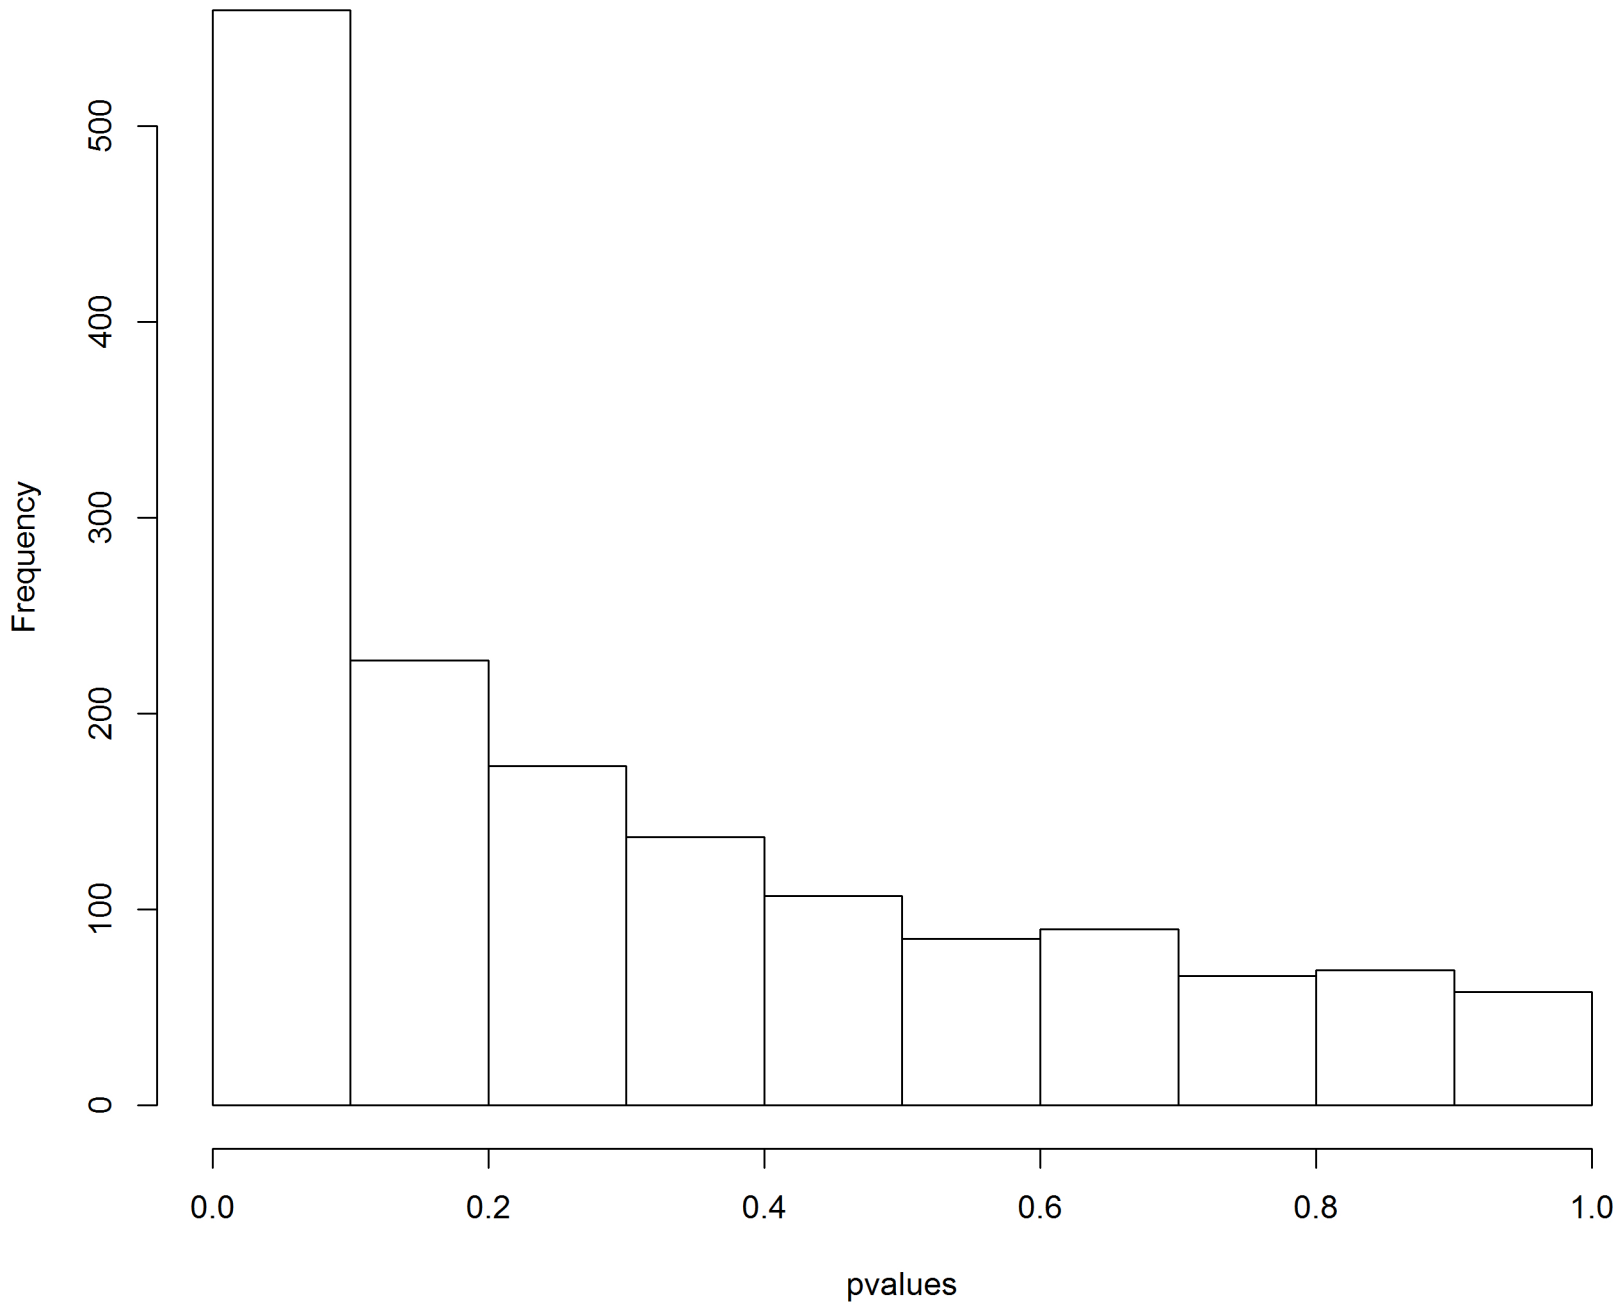

GSE42133 PBC q-values Histogram

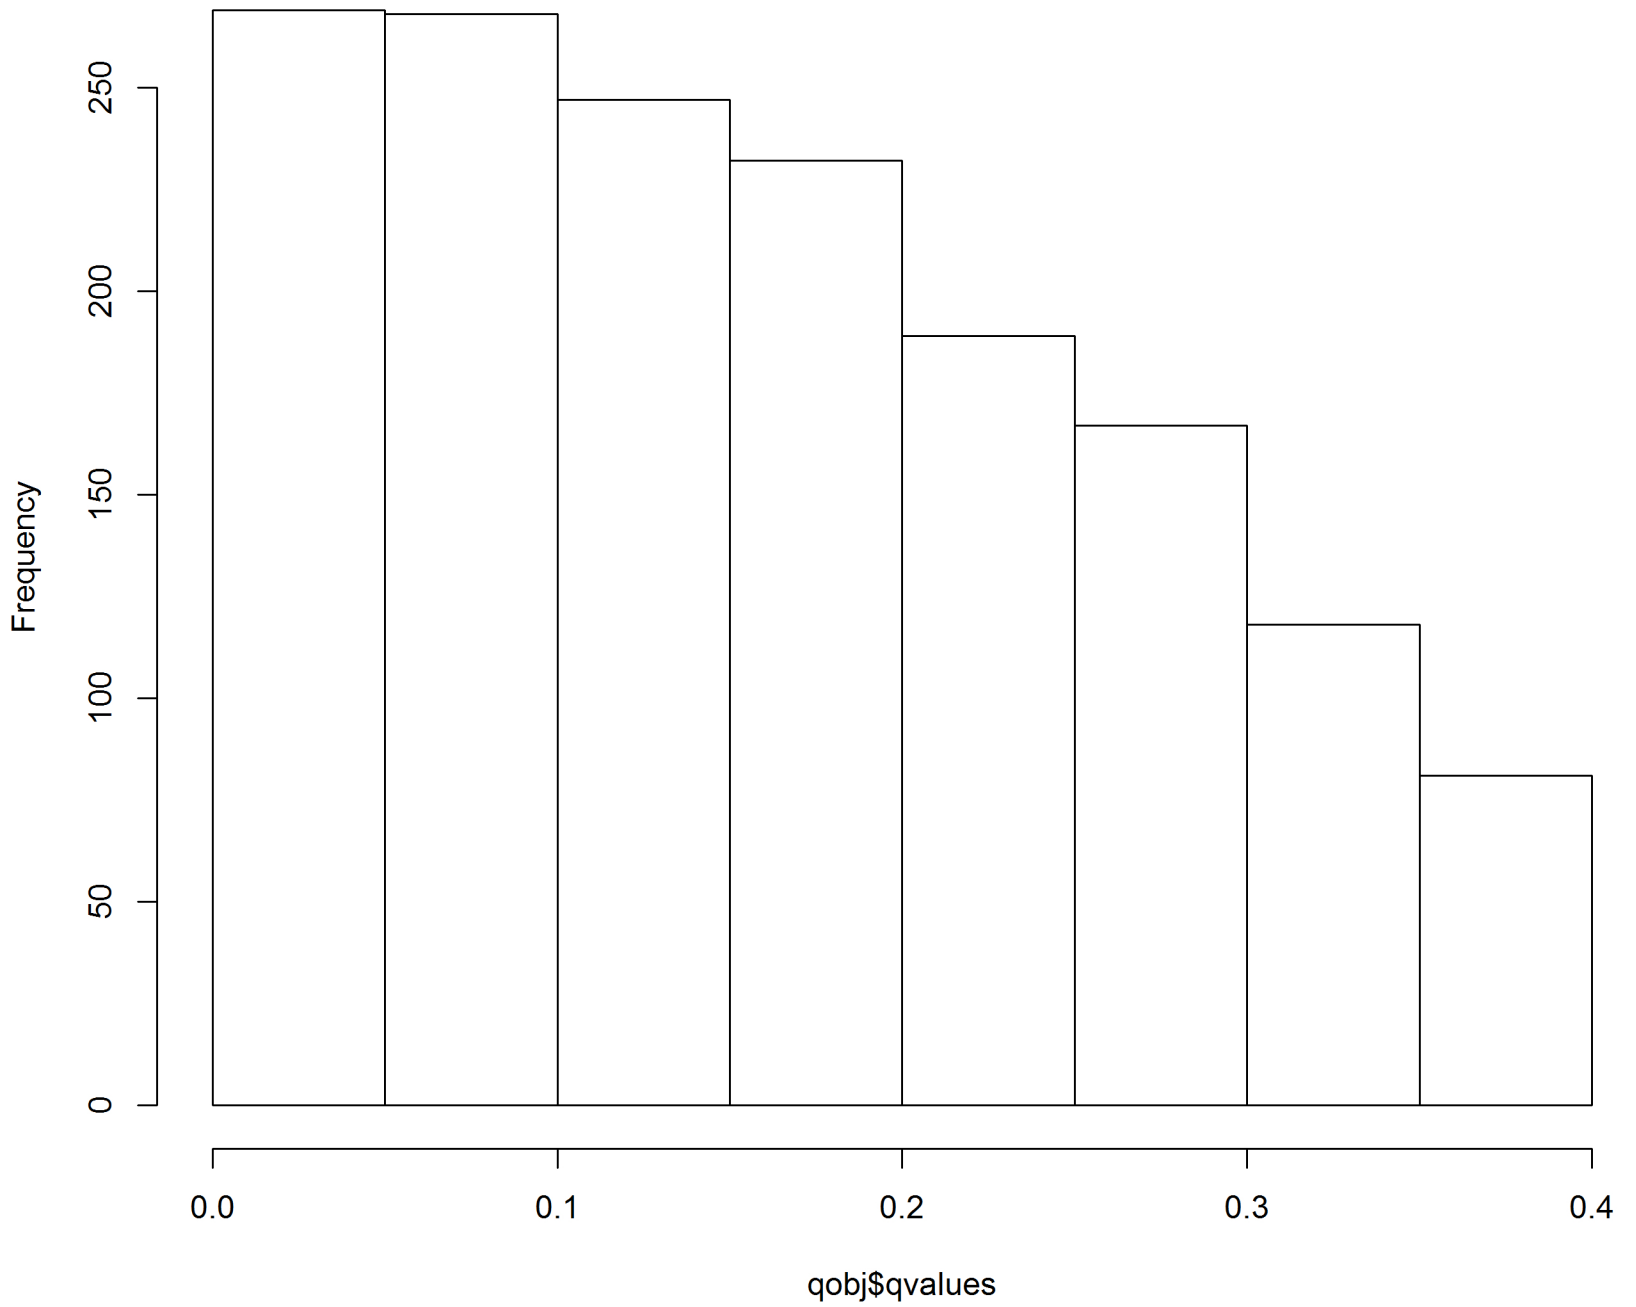

# GSE42133 PBC q-plots

$\hat{\pi}_0 = 0.378$

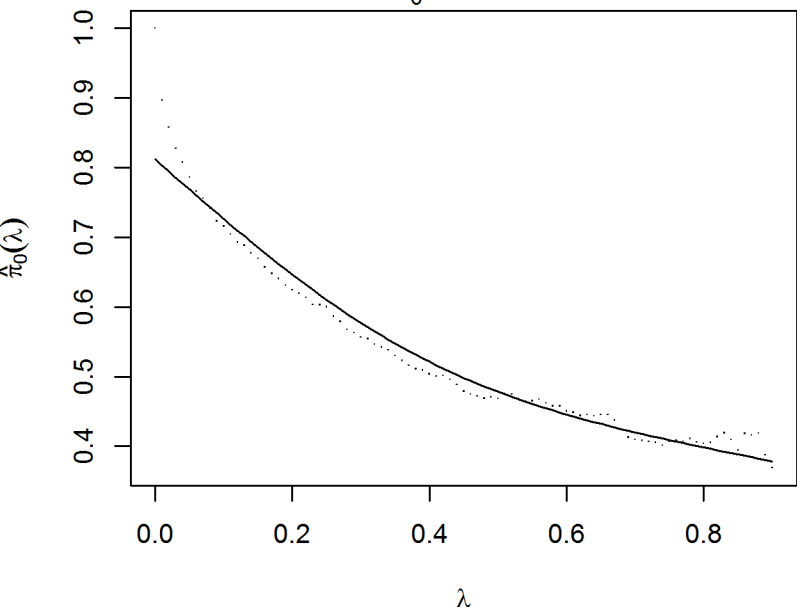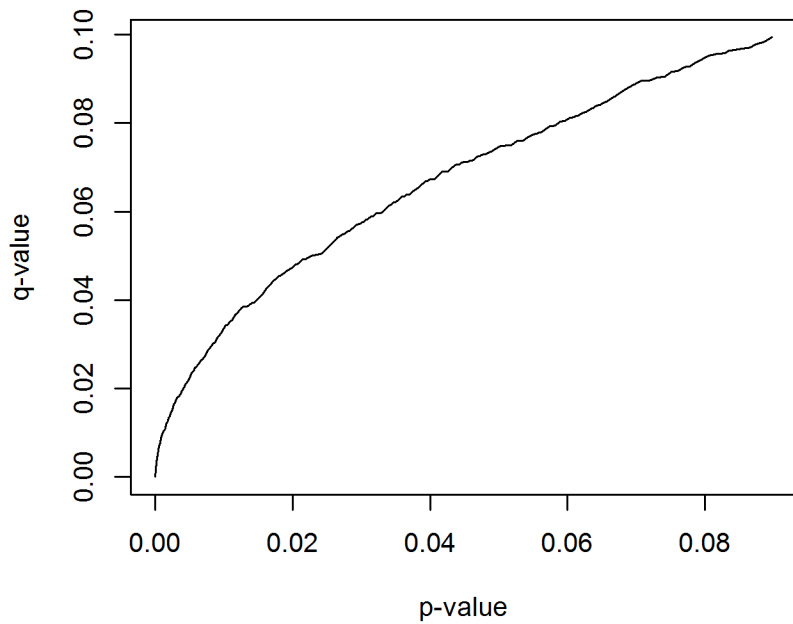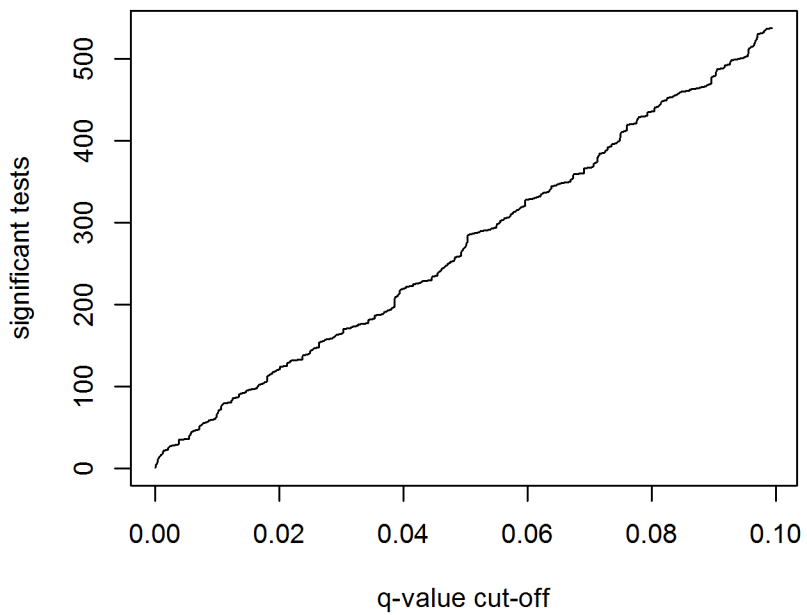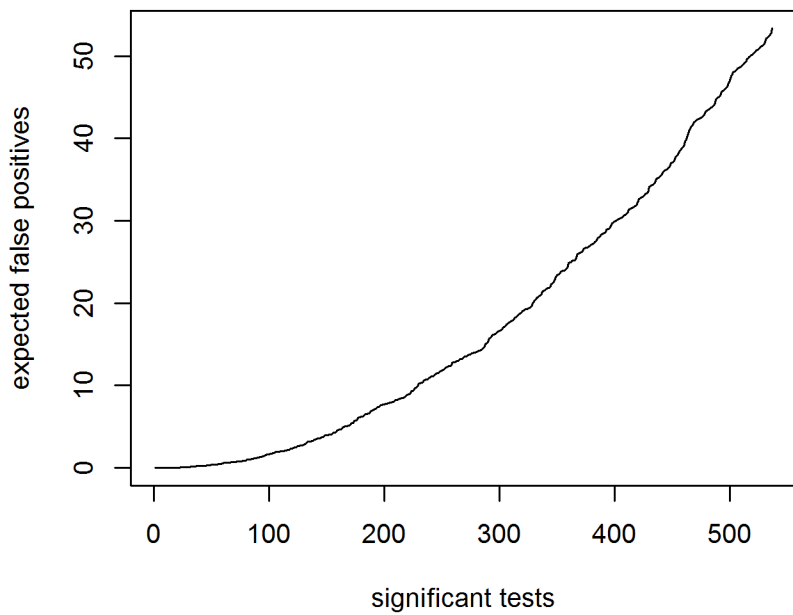

GSE42133 NBC p-values Histogram

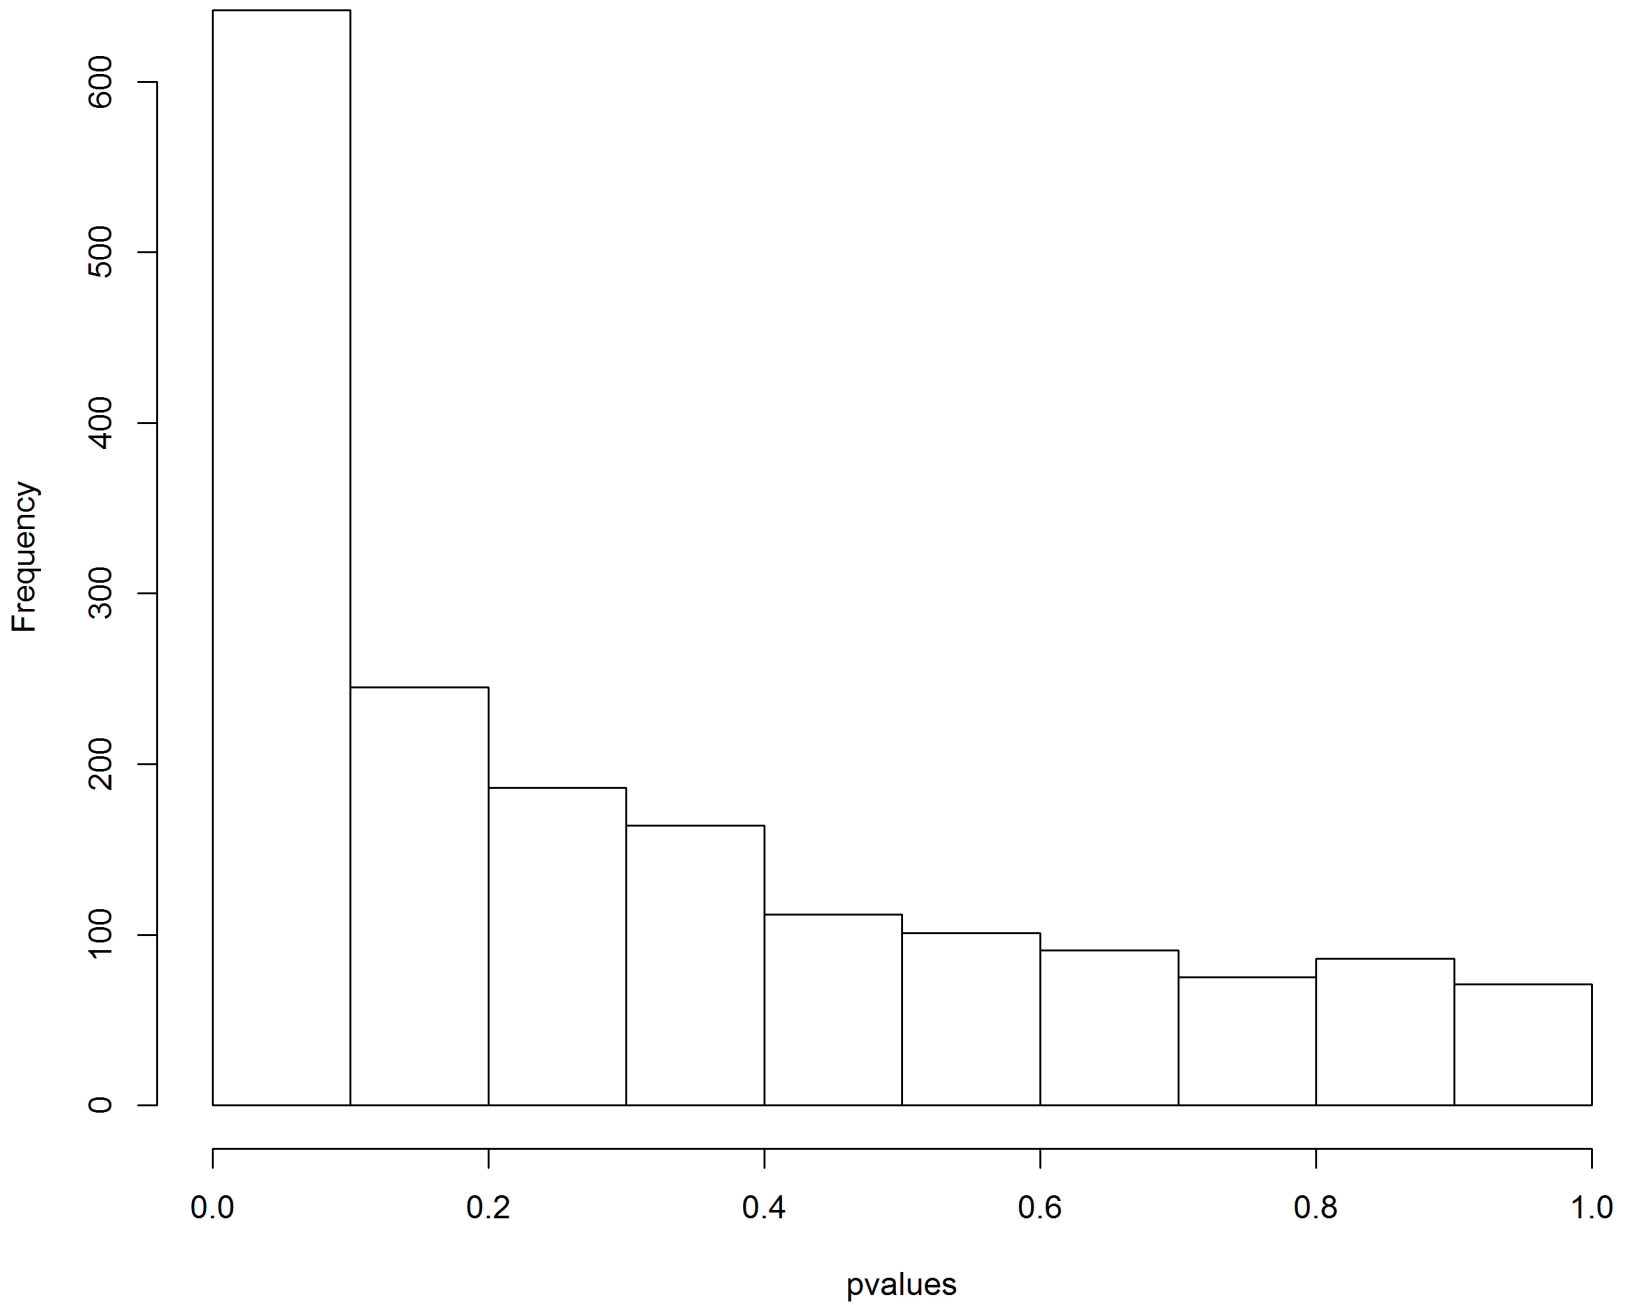



GSE42133 NBC q-values Histogram

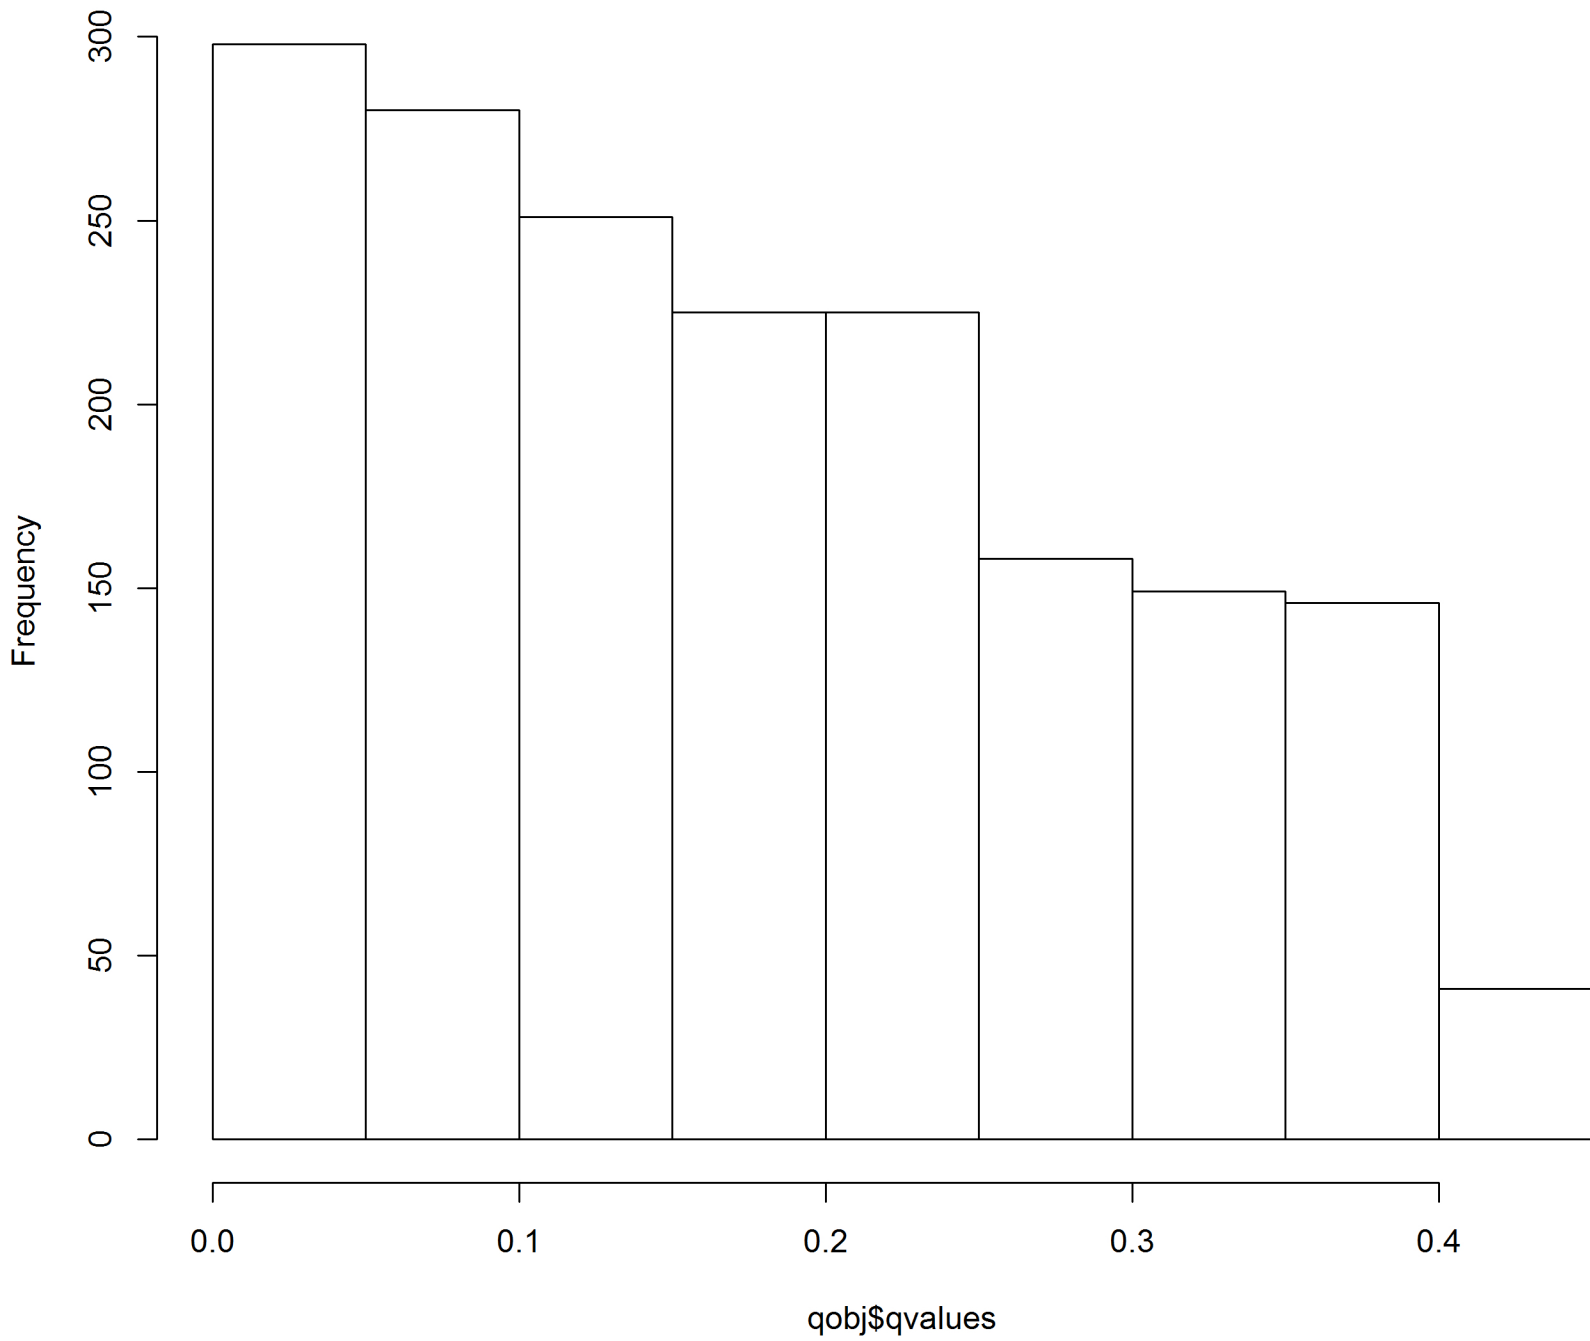

# GSE42133 NBC q-plots

$\hat{\pi}_0 = 0.413$

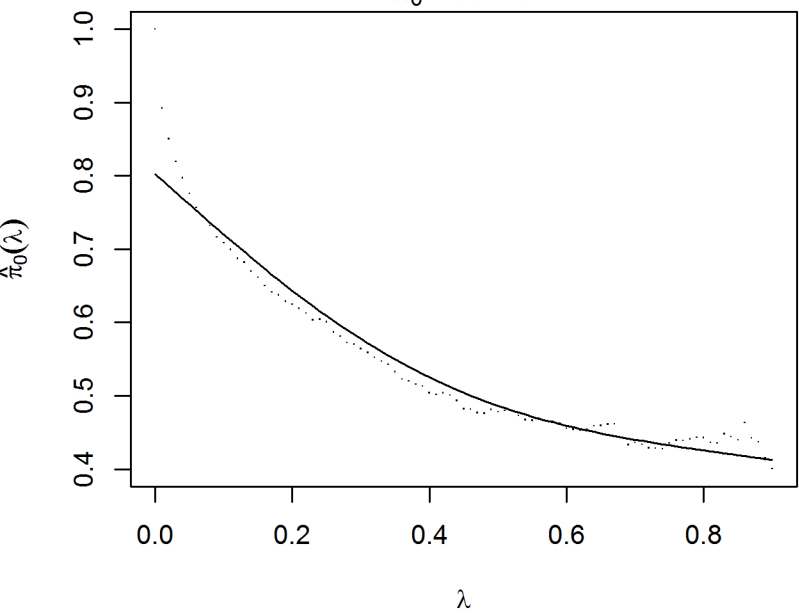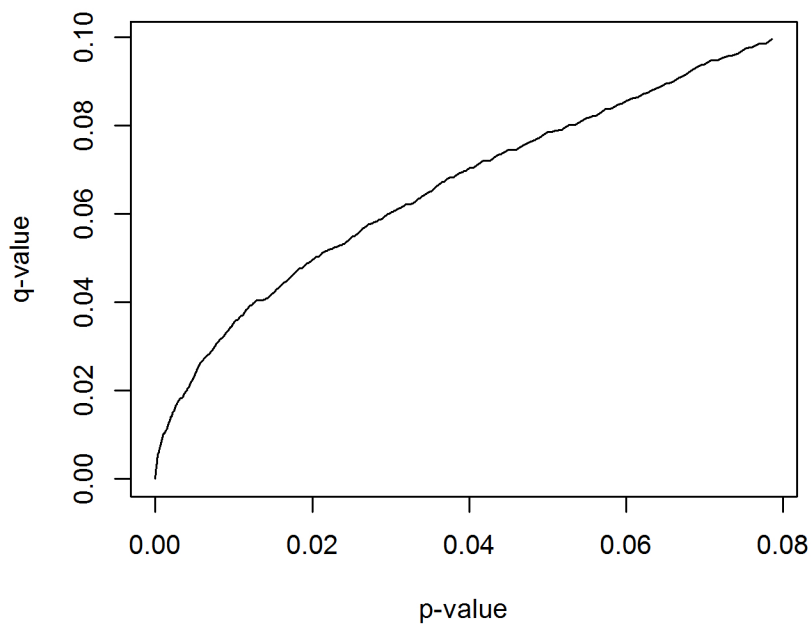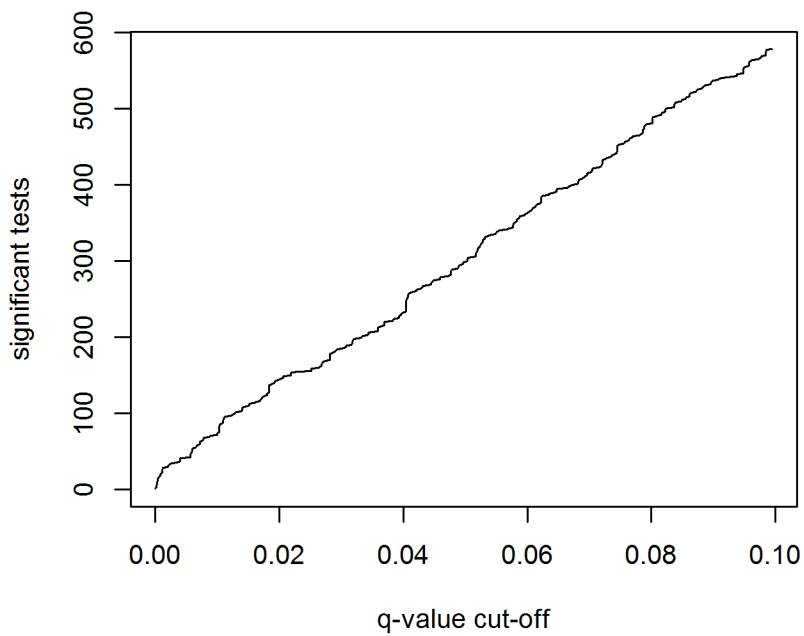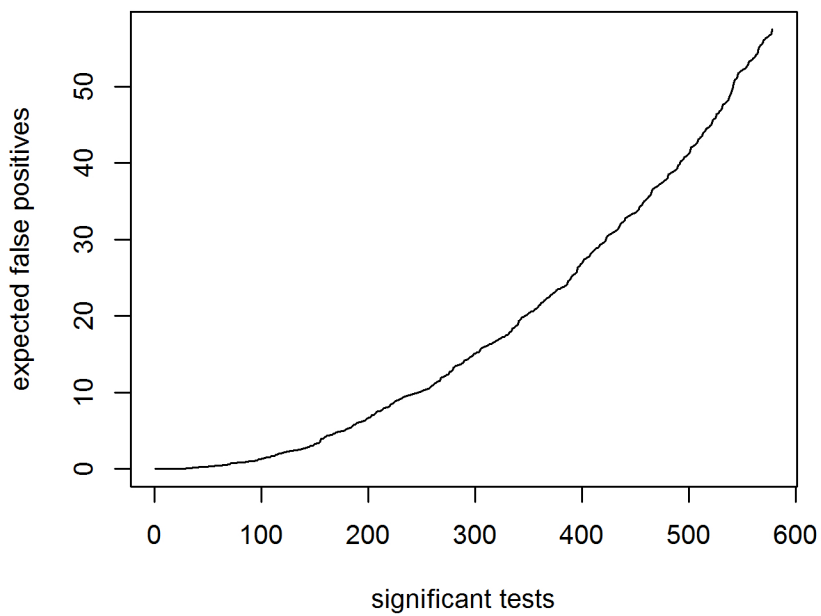

Supplement: 12864_2017_3667_MOESM12_ESM.pdf [file 12864_2017_3667_MOESM12_ESM.pdf]
