# Supplementary material for: Cross-disorder comparative analysis of comorbid conditions reveals novel autism candidate genes
Source: PubMed Central journal article supplement (PMC5399393; doi:10.1186/s12864-017-3667-9), 2017-04-20

NUSE

GSE18123gpl570

RLE

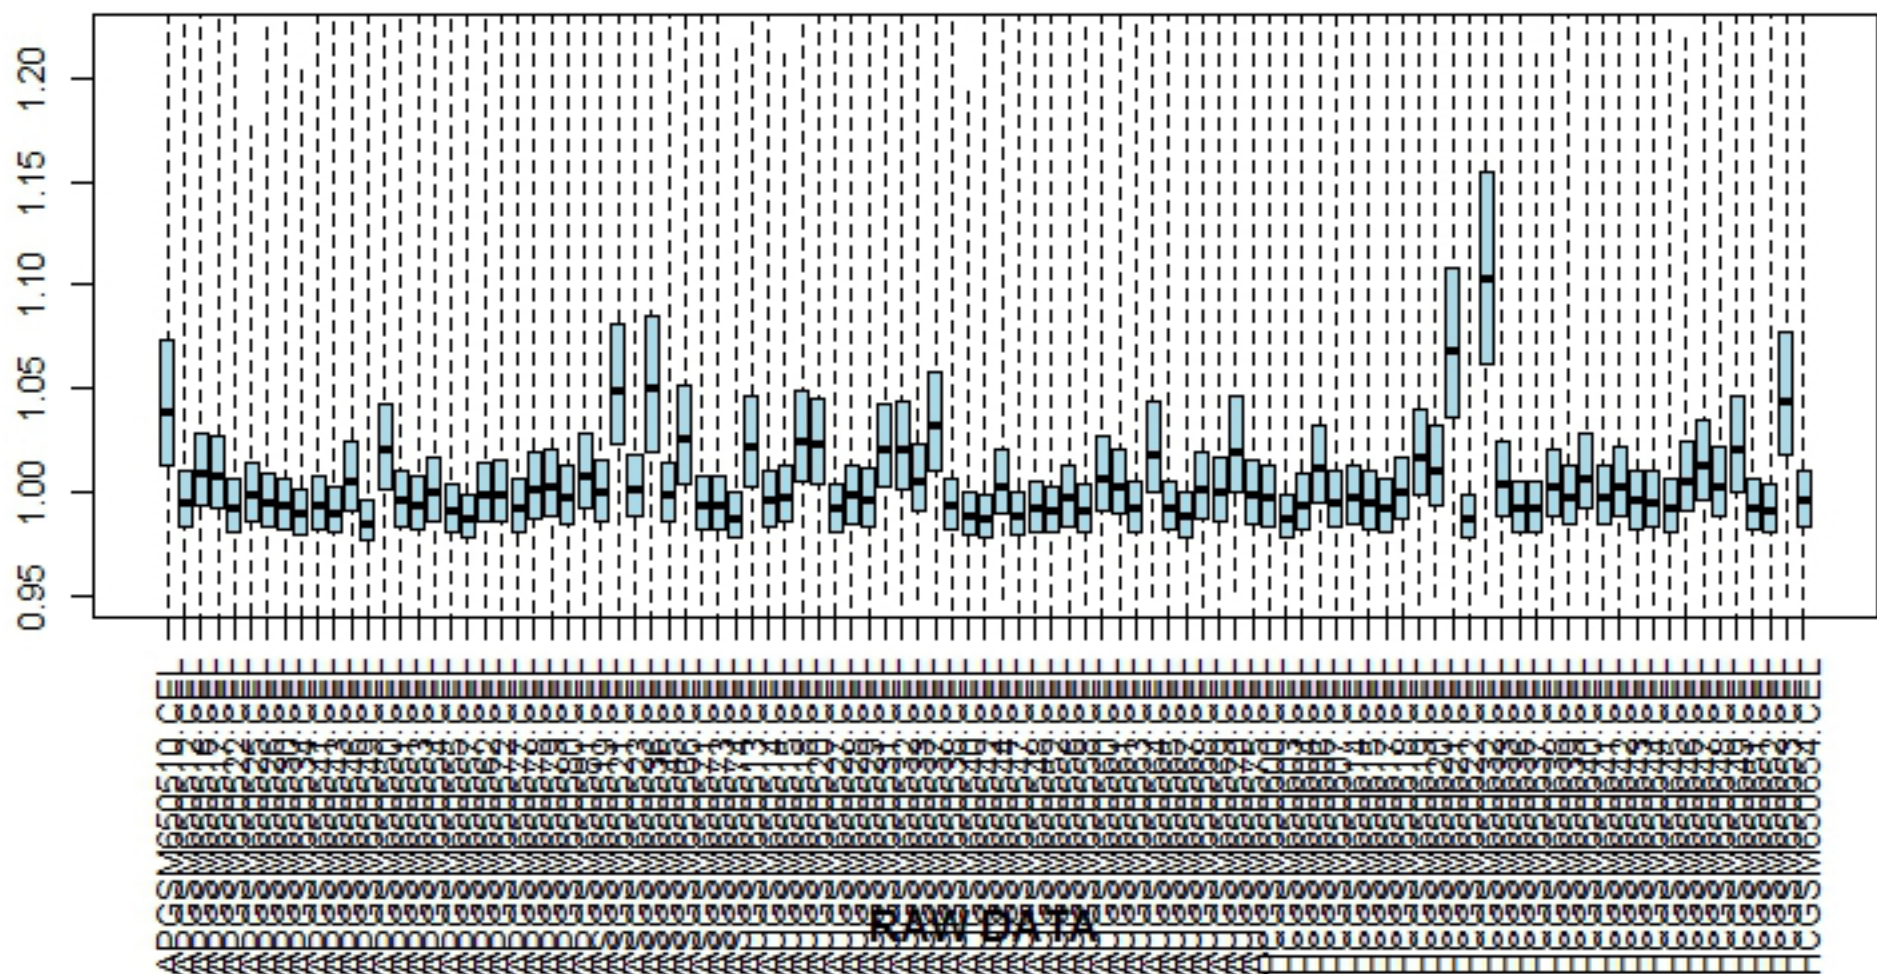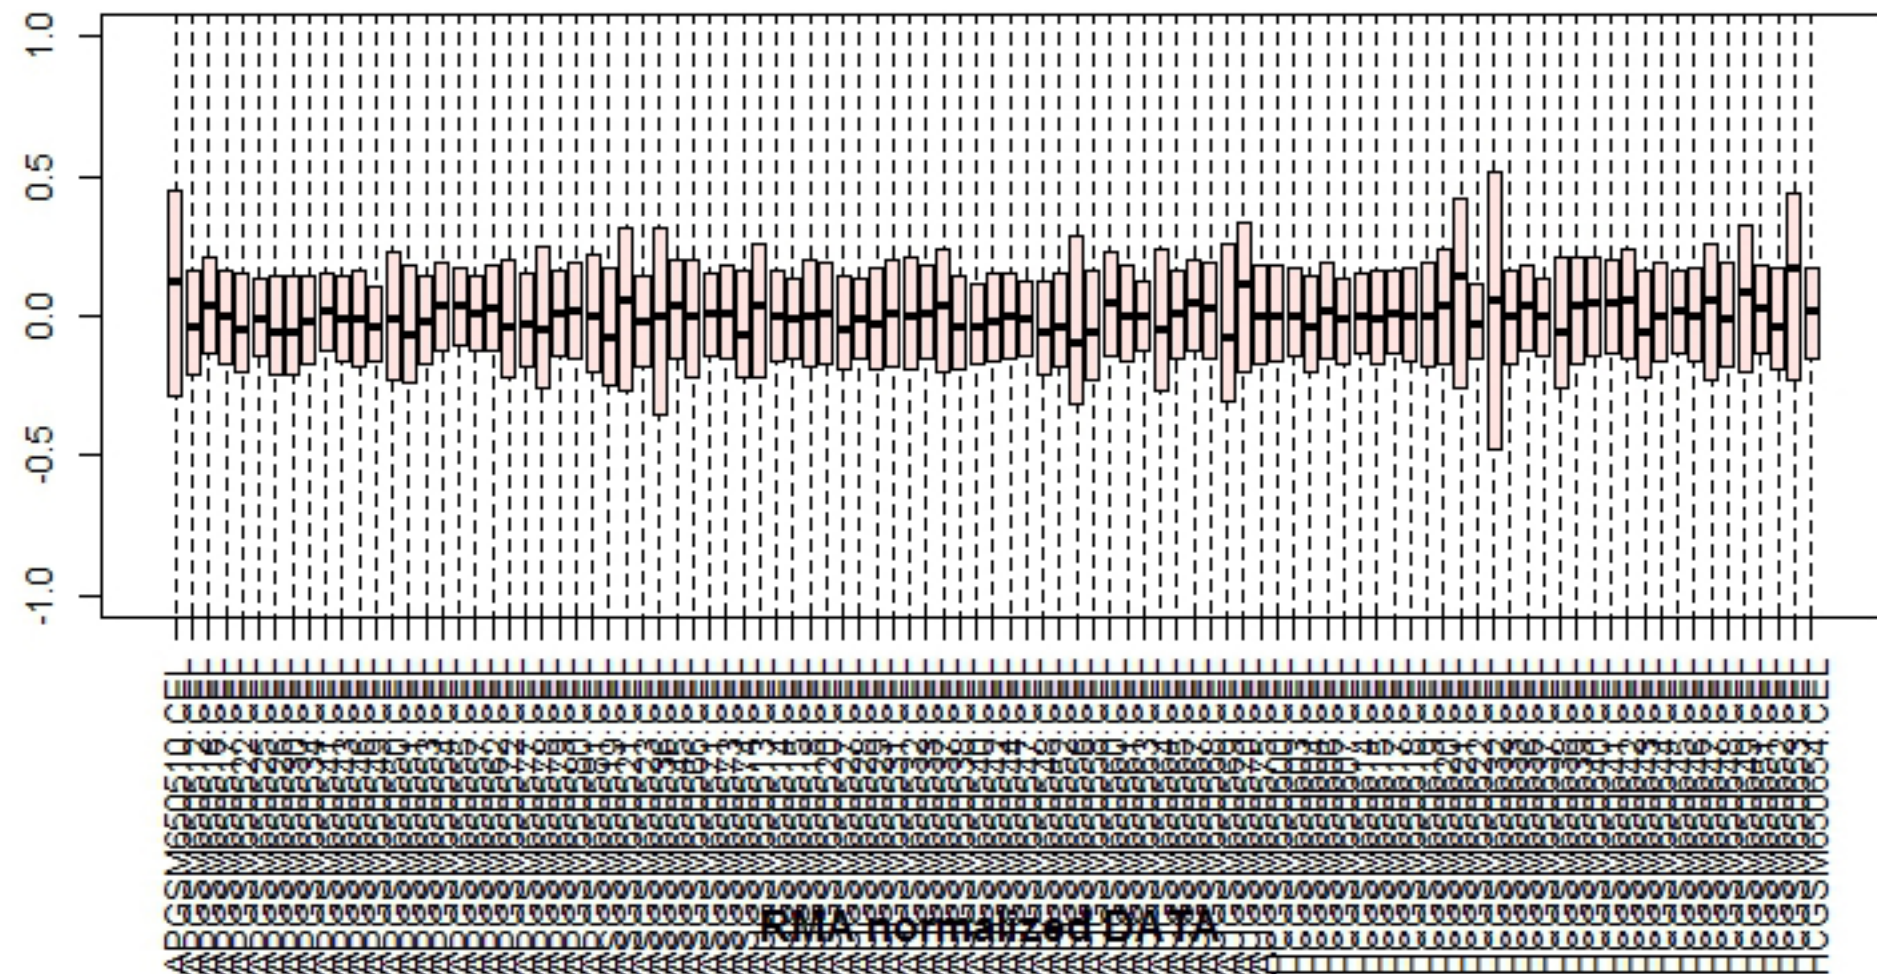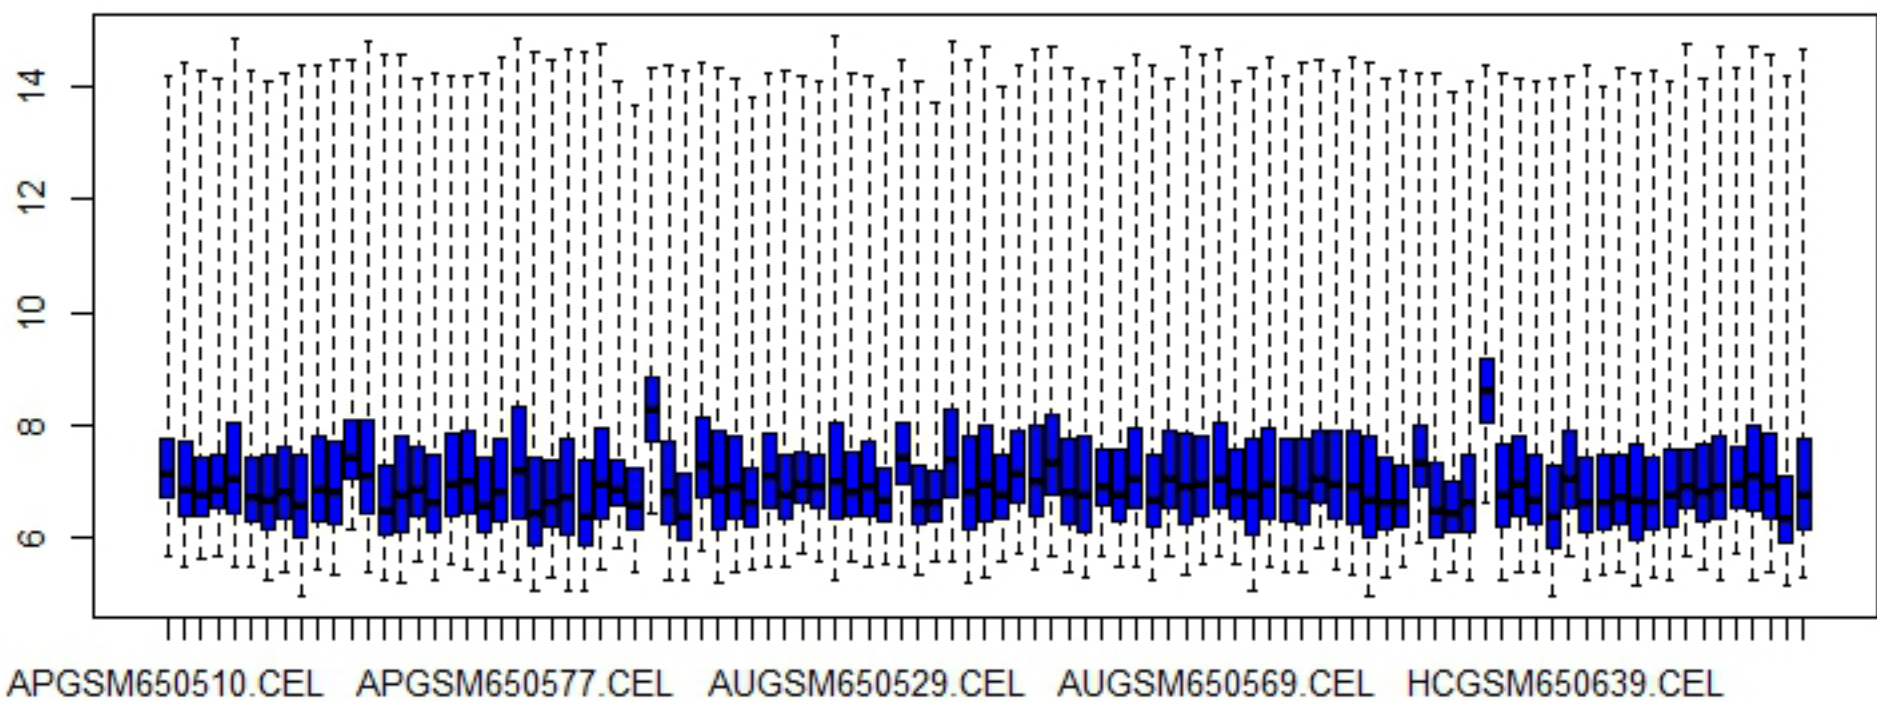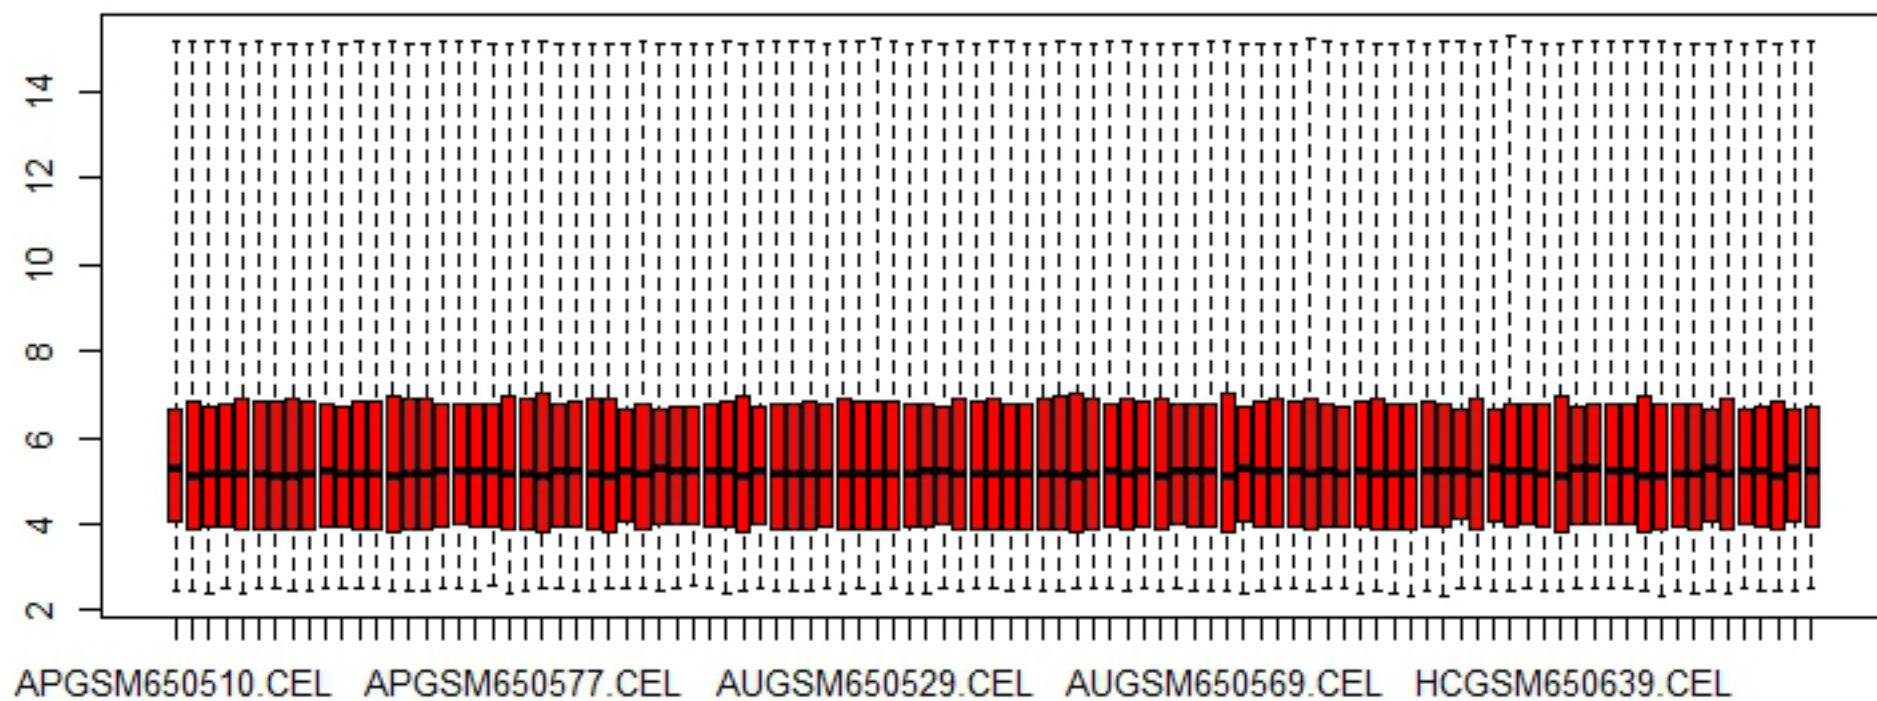

Raw data

RMA normalized data

NUSE

GSE25507

RLE

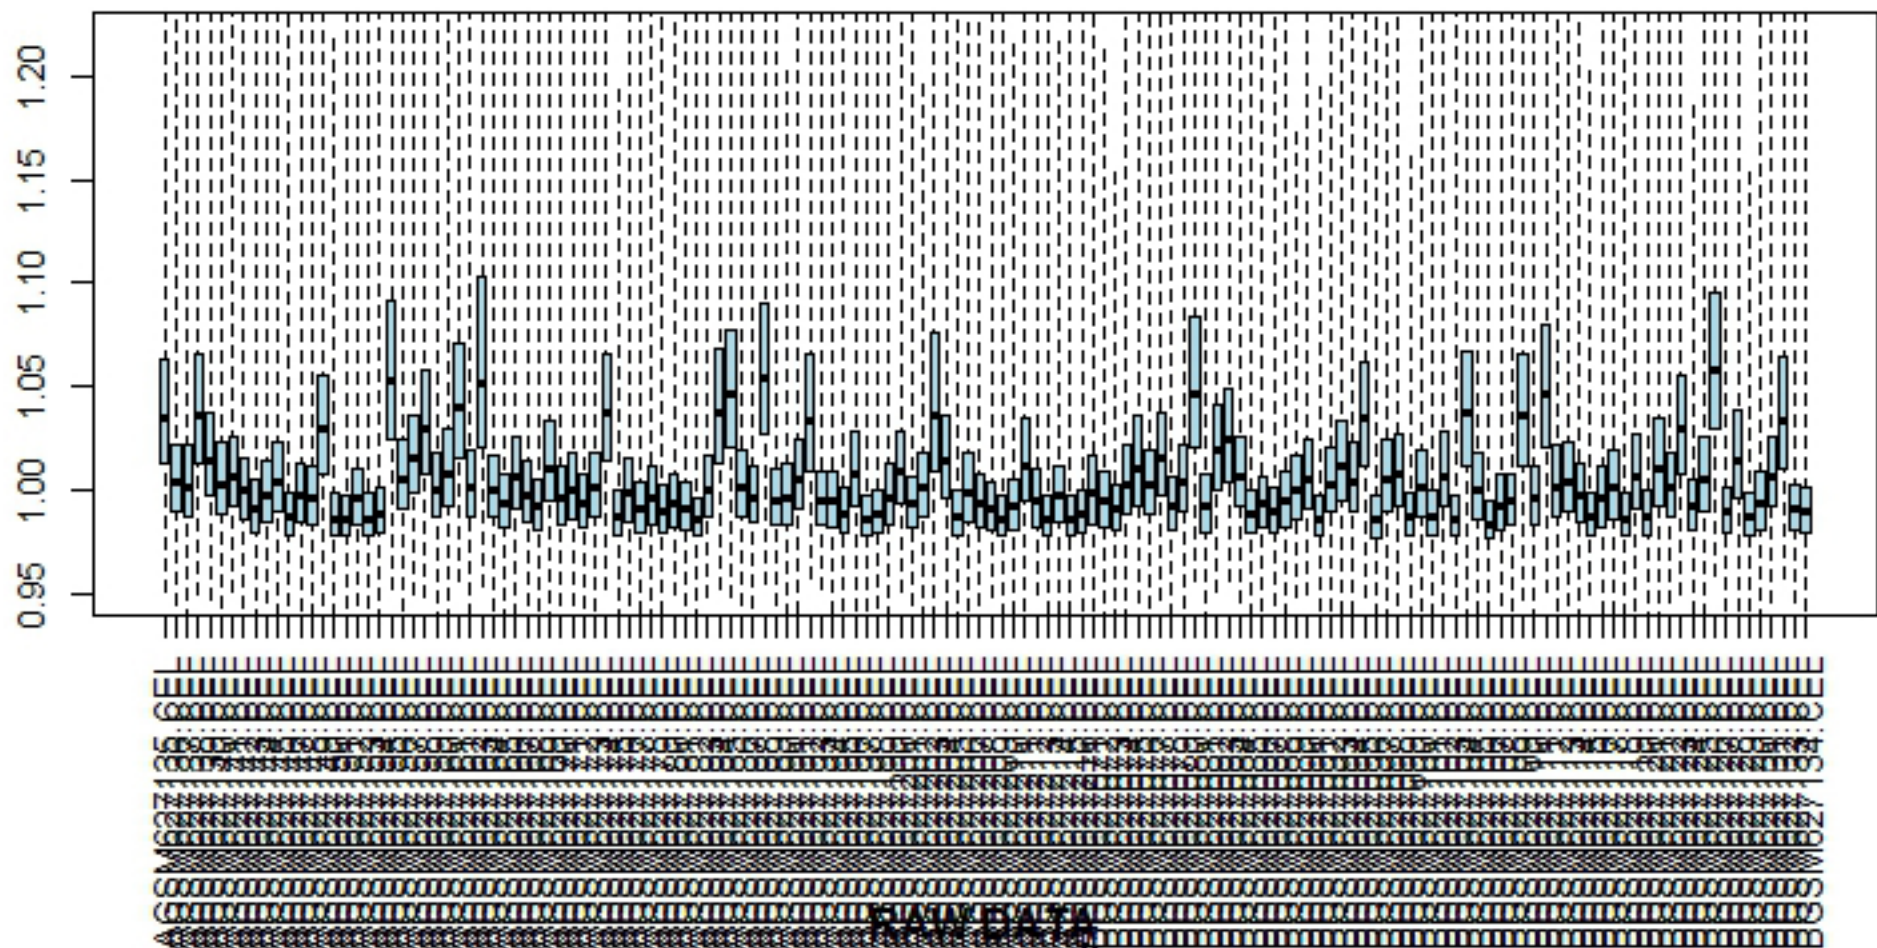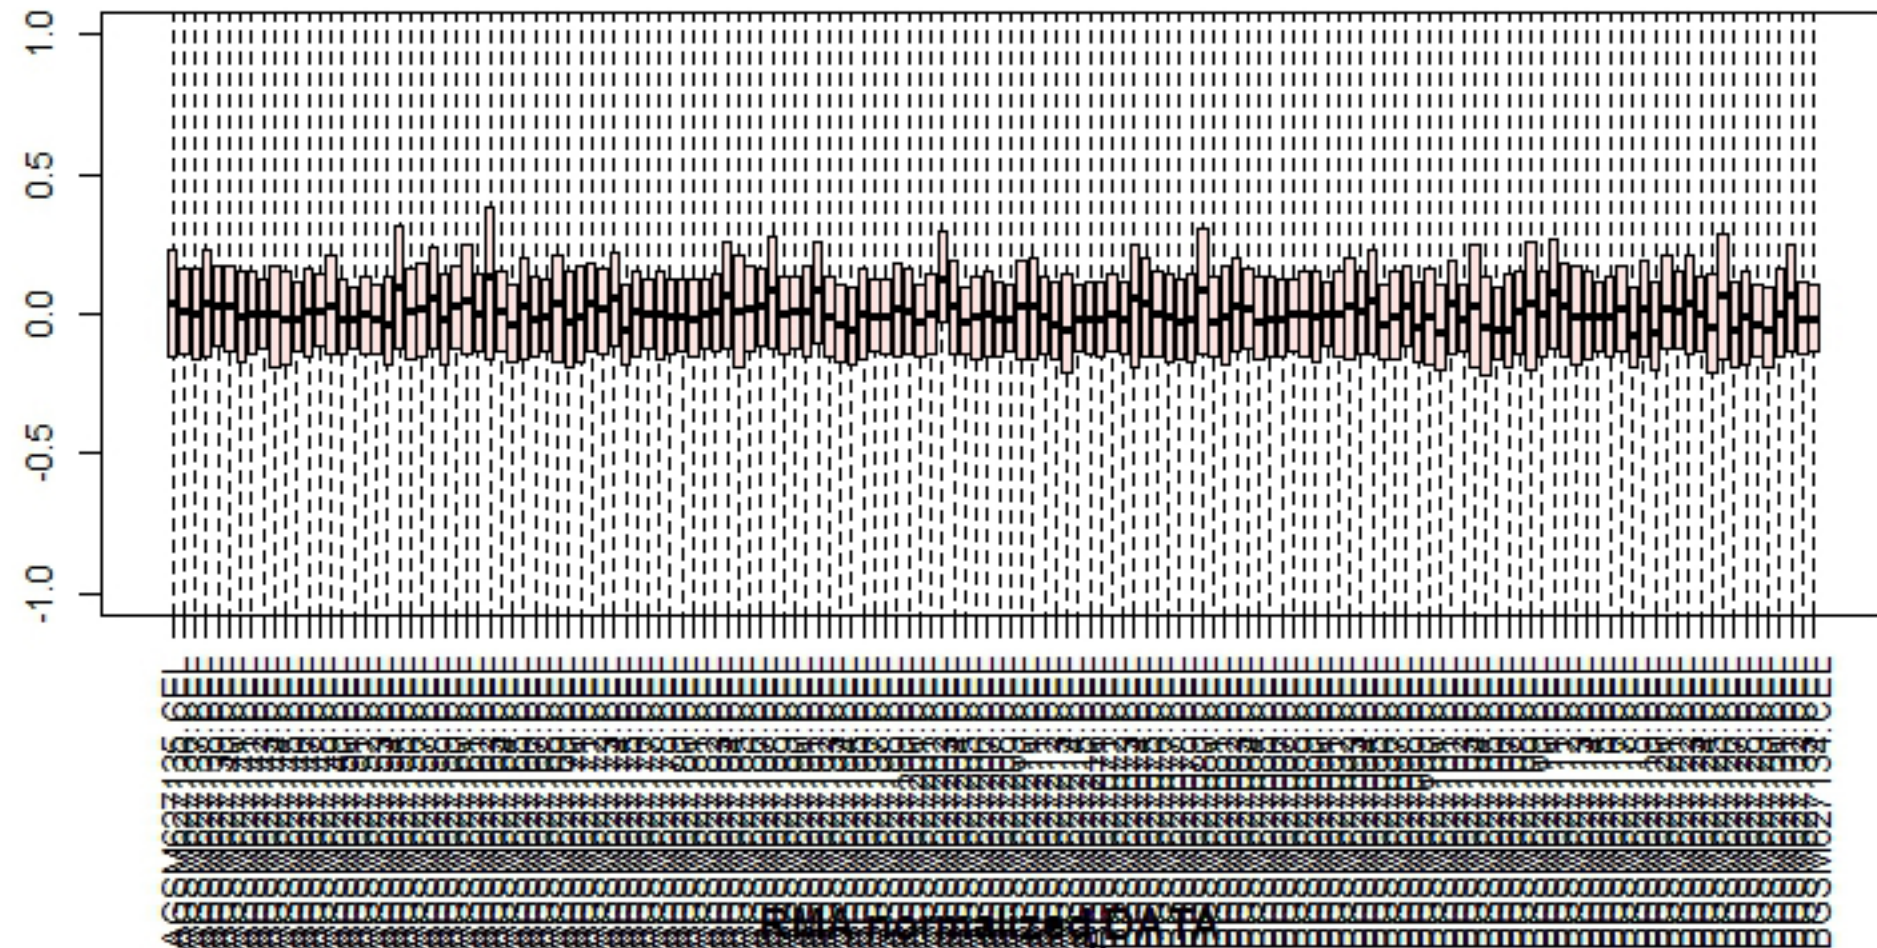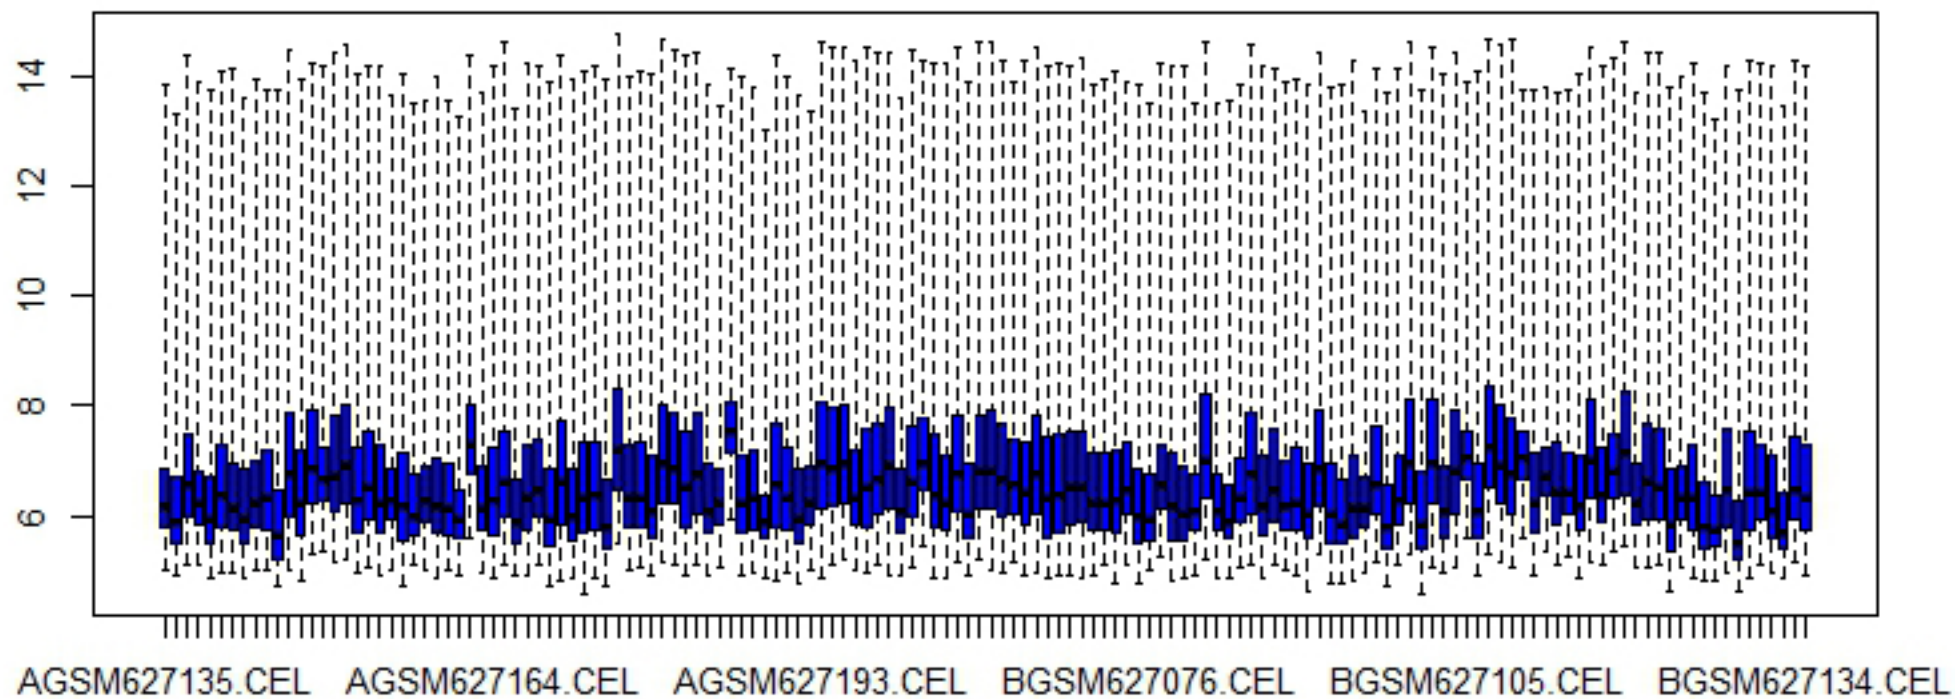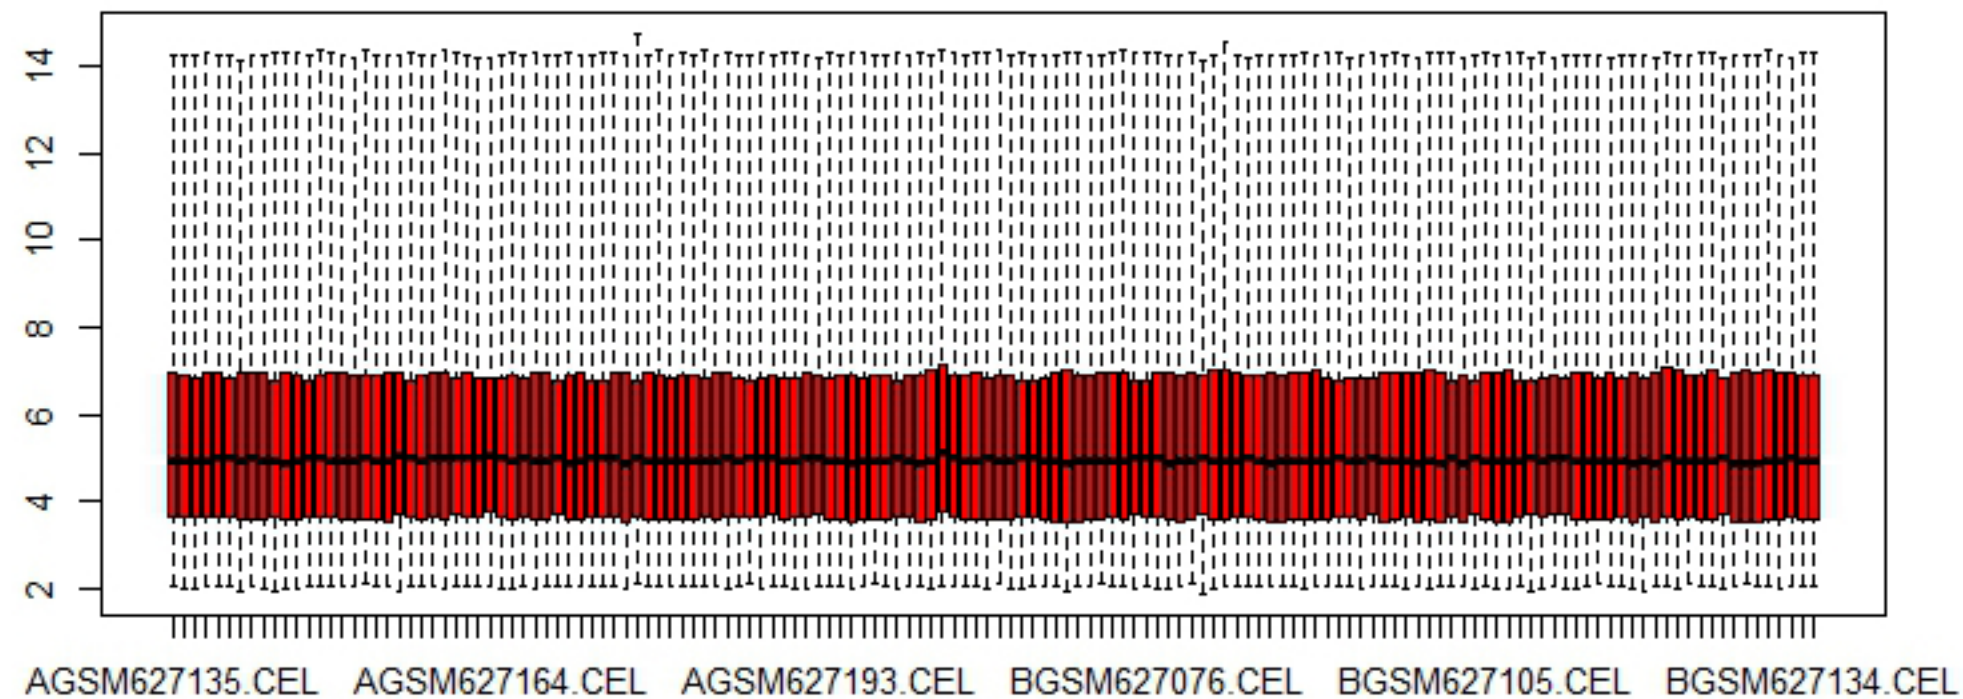

Raw data

RMA normalized data

## GSE42133

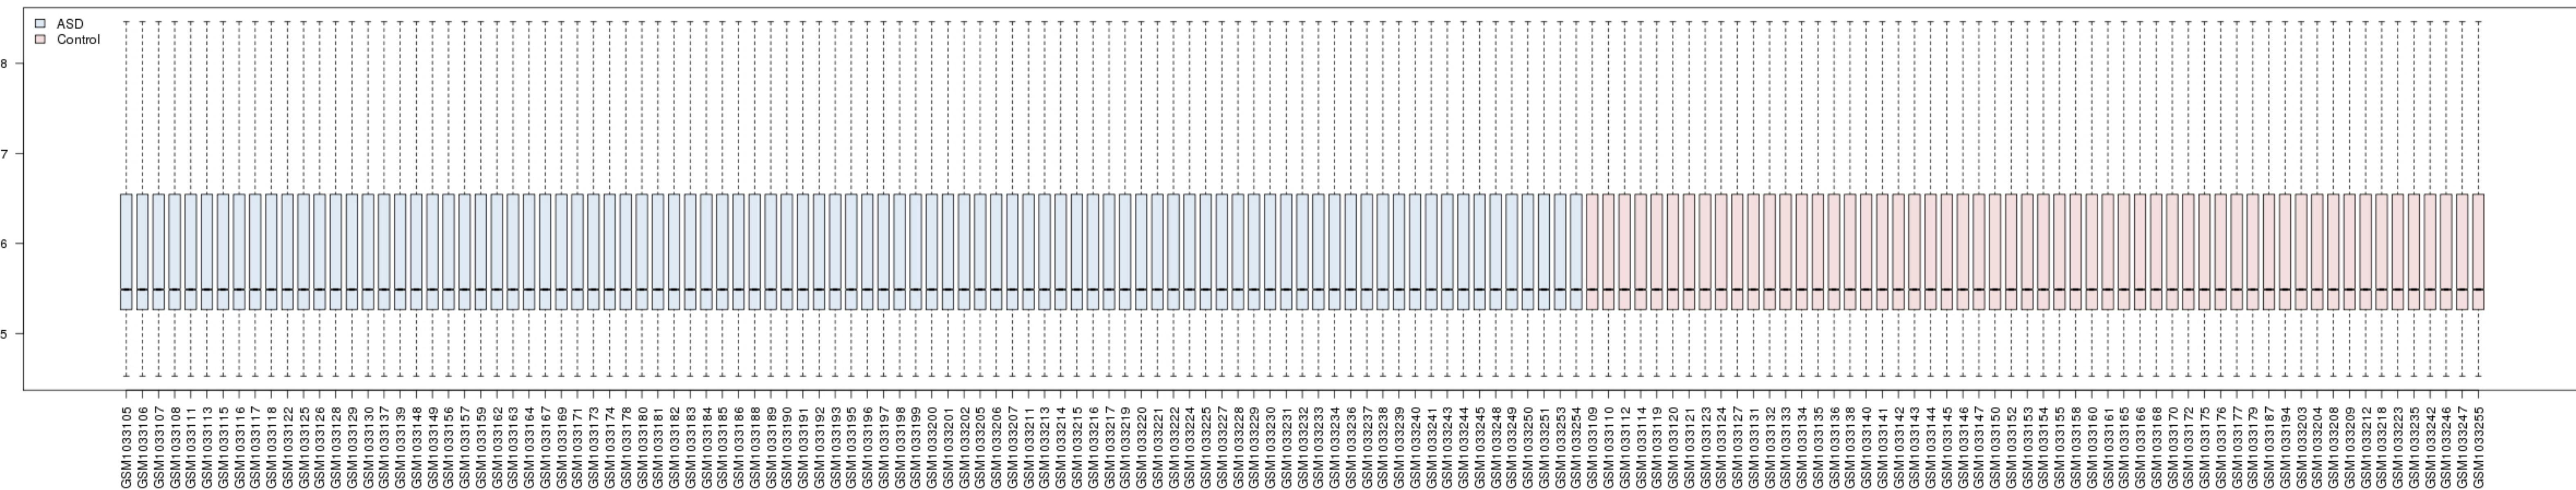

Supplement: 12864_2017_3667_MOESM2_ESM.pdf [file 12864_2017_3667_MOESM2_ESM.pdf]
